1 **Post-entry, spike-dependent replication advantage of B.1.1.7 and B.1.617.2 over B.1 SARS-**  
2 **CoV-2 in an ACE2-deficient human lung cell line**

3  
4 Daniela Niemeyer<sup>1,2</sup>, Simon Schroeder<sup>1</sup>, Kirstin Friedmann<sup>1</sup>, Friderike Weege<sup>1</sup>, Jakob Trimpert<sup>3</sup>,  
5 Anja Richter<sup>1</sup>, Saskia Stenzel<sup>1,4</sup>, Jenny Jansen<sup>1,4</sup>, Jackson Emanuel<sup>1</sup>, Julia Kazmierski<sup>1,4</sup>, Fabian  
6 Pott<sup>1,4</sup>, Lara M. Jeworowski<sup>1</sup>, Ruth Olmer<sup>5</sup>, Mark-Christian Jaboreck<sup>5</sup>, Beate Tenner<sup>1</sup>, Jan Papies<sup>1</sup>,  
7 Julian Heinze<sup>1,2</sup>, Felix Walper<sup>1</sup>, Marie L. Schmidt<sup>1</sup>, Nicolas Heinemann<sup>1</sup>, Elisabeth Möncke-  
8 Buchner<sup>1</sup>, Talitha Veith<sup>1,2</sup>, Morris Baumgardt<sup>6</sup>, Karen Hoffmann<sup>6</sup>, Marek Widera<sup>7</sup>, Tran Thi Nhu  
9 Thao<sup>8</sup>, Anita Balázs<sup>9</sup>, Jessica Schulze<sup>10</sup>, Christin Mache<sup>10</sup>, Markus Morkel<sup>11,12</sup>, Sandra Ciesek<sup>7, 17,</sup>  
10 <sup>18</sup>, Leif G. Hanitsch<sup>13</sup>, Marcus A. Mall<sup>4,9,15</sup>, Andreas C. Hocke<sup>6</sup>, Volker Thiel<sup>8</sup>, Klaus Osterrieder<sup>3,16</sup>,  
11 Thorsten Wolff<sup>10</sup>, Ulrich Martin<sup>5</sup>, Victor M. Corman<sup>1,2,14</sup> Marcel A. Müller<sup>1,2</sup>, Christine Goffinet<sup>1,4,\*</sup>,  
12 Christian Drosten<sup>1,2,4,14\*</sup>

13  
14 <sup>1</sup>Institute of Virology, Campus Charité Mitte, Charité - Universitätsmedizin Berlin, Charitéplatz 1,  
15 10117 Berlin, Germany

16 <sup>2</sup>German Centre for Infection Research, associated partner Charité, Berlin, Germany.

17 <sup>3</sup>Institut für Virologie, Freie Universität Berlin, Robert-von-Ostertag-Straße 7-13, 14163 Berlin,  
18 Germany

19 <sup>4</sup>Berlin Institute of Health, 10178 Berlin, Germany

20 <sup>5</sup>Leibniz Research Laboratories for Biotechnology and Artificial Organs (LEBAO), Department of  
21 Cardiothoracic, Transplantation and Vascular Surgery, REBIRTH - Center for Translational  
22 Regenerative Medicine, Biomedical Research in Endstage and Obstructive Lung Disease  
23 Hannover (BREATH), German Center for Lung Research (DZL), Hannover Medical School, 30625  
24 Hannover, Germany.

25 <sup>6</sup>Department of Infectious Diseases and Respiratory Medicine, Charité - Universitätsmedizin  
26 Berlin, 10117 Berlin, Germany

27 <sup>7</sup>Institute for Medical Virology, University Hospital Frankfurt, Goethe University, Frankfurt am Main,  
28 Germany

29 <sup>8</sup>Institute of Virology and Immunology, Bern, Switzerland

30 <sup>9</sup>Department of Pediatric Respiratory Medicine, Immunology and Critical Care Medicine, Charité-  
31 Universitätsmedizin Berlin, Berlin, Germany.

32 <sup>10</sup>Unit 17 "Influenza and other Respiratory Viruses", Robert Koch Institute, Seestr. 10, 13353  
33 Berlin, Germany

34 <sup>11</sup>Institute of Pathology, Charité-Universitätsmedizin Berlin, corporate member of Freie Universität  
35 Berlin, Humboldt-Universität zu Berlin, Berlin, Germany

36 <sup>12</sup>BIH Bioportal Single Cells, Berlin Institute of Health at Charité Universitätsmedizin Berlin, Berlin,  
37 Germany

38 <sup>13</sup>Institute of Medical Immunology, Charité - Universitätsmedizin Berlin, Corporate Member of  
39 Freie Universität Berlin and Humboldt Universität zu Berlin, Augustenburger Platz 1, Berlin,  
40 Germany.

41 <sup>14</sup>Labor Berlin – Charité Vivantes GmbH, Berlin, Germany

42 <sup>15</sup>German Centre for Lung Research (DZL), associated partner Charité, Berlin, Germany.

43 <sup>16</sup>Department of Infectious Diseases and Public Health, Jockey Club College of Veterinary  
44 Medicine and Life Sciences, City University of Hong Kong, Kowloon Tong, Hong Kong.

45 <sup>17</sup>German Center for Infection Research, DZIF, 38124 Braunschweig, Germany

46 <sup>18</sup>Fraunhofer Institute for Molecular Biology and Applied Ecology (IME), Branch Translational  
47 Medicine and Pharmacology, 60596 Frankfurt am Main, Germany

48

49 \*Corresponding authors:

50 Christine Goffinet, Institute of Virology, Campus Charité Mitte, Charité - Universitätsmedizin Berlin,  
51 Charitéplatz 1, 10117 Berlin, Germany

52 e-mail: [christine.goffinet@charite.de](mailto:christine.goffinet@charite.de)

53

54 Christian Drosten, Institute of Virology, Campus Charité Mitte, Charité - Universitätsmedizin Berlin,

55 Charitéplatz 1, 10117 Berlin, Germany

56 e-mail: [christian.drosten@charite.de](mailto:christian.drosten@charite.de)

57

## 58 **KEYWORDS**

59 SARS-CoV-2; B.1.1.7; B.1.617.2; NCI-H1299 cells; ACE2

60

## 61 **ABSTRACT**

62 Epidemiological data demonstrate that SARS-CoV-2 variants of concern (VOC) B.1.1.7 and  
63 B.1.617.2 are more transmissible and infections are associated with a higher mortality than non-  
64 VOC virus infections. Phenotypic properties underlying their enhanced spread in the human  
65 population remain unknown. B.1.1.7 virus isolates displayed inferior or equivalent spread in most  
66 cell lines and primary cells compared to an ancestral B.1 SARS-CoV-2, and were outcompeted  
67 by the latter. Lower infectivity and delayed entry kinetics of B.1.1.7 viruses were accompanied by  
68 inefficient proteolytic processing of spike. B.1.1.7 viruses failed to escape from neutralizing  
69 antibodies, but slightly dampened induction of innate immunity. The bronchial cell line NCI-H1299  
70 supported 24- and 595-fold increased growth of B.1.1.7 and B.1.617.2 viruses, respectively, in the  
71 absence of detectable ACE2 expression and in a spike-determined fashion. Superior spread in  
72 NCI-H1299 cells suggests that VOCs employ a distinct set of cellular cofactors that may be  
73 unavailable in standard cell lines.

74

## 75 **INTRODUCTION**

76 Since its emergence, severe acute respiratory syndrome coronavirus 2 (SARS-CoV-2) has  
77 genetically diversified, giving rise to variants with altered phenotypic properties (Rambaut et al.  
78 2020). In May 2021 the WHO announced a scheme for labeling SARS-CoV-2 lineages with

79 evidence for increased transmissibility, severity, and escape from immunity  
80 (<https://www.who.int/en/activities/tracking-SARS-CoV-2-variants/>). The B.1.1.7 lineage was  
81 labeled Alpha as it was the first variant of concern (VOC) (O'Toole et al., 2021). First detected in  
82 the United Kingdom in September 2020 ([https://virological.org/t/preliminary-genomic-  
83 characterisation-of-an-emergent-sars-cov-2-lineage-in-the-uk-defined-by-a-novel-set-of-spike-  
84 mutations/563](https://virological.org/t/preliminary-genomic-characterisation-of-an-emergent-sars-cov-2-lineage-in-the-uk-defined-by-a-novel-set-of-spike-mutations/563)), it shows a 50-100% higher reproduction number than previously circulating virus  
85 (Volz et al., 2021). Furthermore, the estimated hazard of death associated with B.1.1.7 is 61%  
86 higher than with pre-existing variants (Davies et al., 2021). B.1.617.2 was identified in India in  
87 October 2020 and was labelled VOC Delta in May 2021. In July 2021, the ECDC reported an  
88 increase of weekly COVID-19 cases observed in 20 European countries of 64.3%. Delta is the  
89 currently predominant circulating strain.

90 Genetic hallmarks of B.1.1.7 comprise a set of mutations resulting in nonsynonymous  
91 changes within the spike gene including deletion of amino acids 69, 70 and 144 in the amino-  
92 terminal domain, an N<sup>501</sup>Y exchange in the receptor-binding domain, an A<sup>570</sup>D exchange in  
93 subdomain 1, P<sup>681</sup>H and T<sup>716</sup>I exchanges in the proximity of the furin cleavage site and the S1 /  
94 S2 domain junction, as well as S<sup>982</sup>A and D<sup>1118</sup>H in the S2 domain. In addition to SNPs in ORF1ab  
95 and nucleoprotein, ORF8 in variant B.1.1.7. contains a premature stop codon. The functional role  
96 of ORF8 in SARS-CoV-2 is unclear. A variant with deleted ORF8 that circulated in Singapore  
97 during spring 2020 showed limited evidence for changes in *in-vitro* transcription profile (Gamage  
98 et al., 2020) and clinical outcome (Young et al., 2020).

99 To date, a functional correlate for the enhanced transmission and pathogenicity of B.1.1.7  
100 and B.1.617.2 is missing. Studies of viral loads demonstrated that B.1.1.7- and B.1.617.2-infected  
101 individuals shed viral RNA of increased levels (Jones et al., 2021; Wang et al., 2021) and for  
102 prolonged time (Kissler et al., 2021b; Ong et al., 2021). Individual mutations in B.1.1.7 and  
103 B.1.617.2 spike have been investigated with regards to protein structure (Yang et al., 2021), *in*  
104 *vitro* ACE2-binding (Ramanathan et al., 2021), spike processing (Liu et al., 2021; Lubinski et al.,

105 2021a) and stability (Motozono et al., 2021), as well as fitness (Motozono et al., 2021). In contrast  
106 to B.617.2 (Hoffmann et al., 2021a; Mlcochova et al., 2021; Planas et al., 2021), B.1.1.7 displays  
107 only modest, if any, alteration of sensitivity to neutralizing antibodies (Hoffmann et al., 2021b;  
108 Shen et al., 2021; Widera et al., 2021), suggesting a limited contribution of antibody-dependent  
109 immune escape to the observed phenotype of B.1.1.7. *In vitro* and *in vivo* replication of B.1.1.7  
110 was found to differ depending on the model used. Some epithelial cell cultures and hamster  
111 models showed equal, slightly superior, or inferior replication for B.1.1.7 (Brown et al., 2021;  
112 Nuñez et al., 2021; Touret et al., 2021; Ulrich et al., 2021), while B.1.1.7 generally exhibited  
113 marginally superior replication in primates and ferrets (Rosenke et al., 2021; Ulrich et al., 2021).  
114 However, animal models may be limited in their capability to reflect adaptive processes that occur  
115 in a virus establishing endemicity in humans. Here, we studied the replication of B.1.1.7 viruses  
116 in different cell and organ models as well as dwarf hamsters, and identified a human cell line that  
117 reflects the replicative phenotype of B.1.1.7 as well as of B.1.617.2.

118

## 119 **RESULTS**

### 120 **B.1 and B.1.1.7 SARS-CoV-2 display similar replication kinetics in immortalized cell lines**

121 We first studied virus replication kinetics in a panel of immortalized cell lines. Compared to an  
122 early lineage (Non-VOC) B.1 strain carrying the D<sup>614</sup>G mutation (BavPat1/2020, (Wölfel et al.,  
123 2020)), two different clade B.1.1.7 isolates displayed smaller plaque size three days post-infection  
124 (Fig. 1A) and a delayed manifestation of cytopathogenic effects (CPE) in Vero E6 cells (Fig. 1B  
125 and Supplementary Movies), accompanied by a delay in infectious particle production during the  
126 initial 40 hours post-infection of Vero E6 cells (Fig. 1C).

127 Unlike Vero E6 cells, Caco-2 and Calu-3 cells express the transmembrane protease serine  
128 subtype 2 (TMPRSS2) and are capable of producing type I interferons (IFNs). They supported the  
129 growth of B.1. equally or more efficiently than B.1.1.7 (Fig. 1D-E). Interestingly, B.1.1.7 production

130 was particularly delayed in the very early phase of replication (Fig. 1F). Cultivation of infected cells  
131 at 32°C in order to resemble the temperature in the upper respiratory tract did not alter relative  
132 replication efficiencies (Fig. 1G). Under competitive passaging in Calu-3 cells, B.1 outcompeted  
133 B.1.1.7, even when the starting inoculum contained a nine-fold excess of B.1.1.7 (Fig. 1H). In sum,  
134 immortalized cell models failed to establish a clear growth advantage of B.1.1.7 that correlates  
135 with its enhanced transmissibility and pathogenicity *in vivo*.

136  
137 **Absence of detectable fitness advantages of B.1.1.7 in primary human respiratory cells,**  
138 **organoids and hamsters**

139 To detect potential variant-specific differences that may not become evident in immortalized cell  
140 lines, we studied more complex, physiologically relevant, primary human models of mucosal  
141 infection. Infection experiments in differentiated air-liquid interface cultures of human nasal (Fig.  
142 2A), human bronchial (Fig. 2B) airway epithelial cultures (hBAECs), as well as epithelial intestinal  
143 organoids (Fig. 2C) failed to reveal a growth advantage for B.1.1.7 isolates compared to B.1.  
144 Growth of B.1.1.7 was even slightly inferior to B.1 in adult stem cell-derived human lung organoids  
145 (Fig. 2D). Virus production in the lung of infected dwarf hamsters was not different between any  
146 of the viruses used. In addition, virus production in the lungs of contact animals co-housed with  
147 infected animals did not show variant-specific quantitative differences in preliminary analyses (Fig.  
148 2E).

149  
150 **B.1.1.7 spike protein shows decreased proteolytic processing**

151 To identify potential consequences of B.1.1.7 spike mutations on expression and proteolytic  
152 processing of the glycoprotein, we analyzed lysates of HEK293T cells transfected with plasmids  
153 expressing SARS-CoV-2 spike-HA. Overall expression levels of spike constructs encoding  
154 individual or all B.1.1.7-specific mutations did not differ significantly from B.1 constructs in  
155 quantitative immunoblots (Fig. 3A, Fig. S1A). However, quantification of the proportion of S2-HA

156 spike relative to the total spike-HA signal revealed a 1.8-fold reduction of proteolytic processing of  
157 the B.1.1.7 glycoprotein compared to that of B.1 (Fig. 3A). No single B.1.1.7-defining mutation,  
158 including P<sup>681</sup>H, fully recapitulated this property, even though deletion of H<sup>69</sup>/V<sup>70</sup> showed a trend  
159 towards more efficient processing, in agreement with (Meng et al., 2021), and T<sup>716</sup>H showed a  
160 trend towards decreased proteolytic processing. The data suggest that a combination of amino  
161 acid exchanges is required for rendering proteolytic processing of B.1.1.7 spike less efficient.  
162 Reduced processing of B.1.1.7 spike was accompanied by a 2.3-fold decrease of spike levels  
163 associated with lentiviral particles, when compared to particles containing B.1 spike (Fig. 3B).  
164 Interestingly, the individual T<sup>716</sup>H mutation was sufficient for reduction of spike quantities  
165 associating to lentiviral particles. In accordance with previous reports (Kemp et al., 2021; Meng et  
166 al., 2021), deletion of H<sup>69</sup>/V<sup>70</sup> increased spike abundance in pseudotyped particles.

167 We challenged these findings by analysis of SARS-CoV-2-infected cells. B.1.1.7 spike in  
168 infected Vero E6 cells showed a 2.4-fold reduced processing efficiency (Fig. 3C, left panel and  
169 immunoblot, Fig. S1B). In virus particles, the ratio of spike per nucleocapsid signal appeared  
170 intact, suggesting that inefficient proteolytic cleavage does not translate into a decreased  
171 association of mature S2 into virions (Fig. 3C, middle panel and immunoblot). Overall, expression  
172 levels of spike did not differ significantly from B.1 in quantitative immunoblots (Fig. S1C).

173

#### 174 **Enhanced cell-cell fusion and reduced virus particle entry by B.1.1.7 SARS-CoV-2 spike**

175 We next analyzed fusogenicity of individual spike proteins in a cell-cell fusion assay based on co-  
176 cultures of CHO cells transiently expressing HIV-1 Tat and individual SARS-CoV-2 spike proteins,  
177 and ACE2/TMPRSS2-transfected, LTR-luciferase-expressing target TZM-bl cells. Compared to  
178 B.1 spike, no significant changes in membrane fusion activity were detected with any single  
179 mutation present in B.1.1.7 spike (Fig. 4A). However, full B.1.1.7 spike was more prone to induce  
180 cell-cell fusion. Furthermore, entry of lentiviral pseudotypes mediated by the same set of spike  
181 proteins was quantified after transduction of Calu-3 cells using p24 capsid normalized inocula in

182 a luciferase-based assay (Fig. 4B). Whereas most individual mutations did not significantly alter  
183 the ability of SARS-CoV-2 spike to mediate entry into Calu-3 cells, T<sup>716I</sup> and the full B.1.1.7 spike  
184 mediated reduced entry (Fig. 4B, Supplemental Fig. S2A). The inferior ability of B.1.1.7 spike-  
185 containing lentiviral pseudotypes to transduce Calu-3 cells was corroborated in titration  
186 experiments on ACE2/TMPRSS2-positive A549 cells (Fig. 4C) and is potentially related to the  
187 lower levels of incorporated spike when compared to B.1 spike-pseudotyped particles.

188 We next investigated entry kinetics in Calu-3 and A549-ACE2 cells with authentic SARS-  
189 CoV-2. In single-cycle entry experiments, virus inocula were absorbed at 4°C for one hour, cells  
190 were washed to remove excessive virus particles, and the cells eventually incubated at 37°C to  
191 initiate synchronized entry. *De novo*-synthesized, cell-associated subgenomic transcripts served  
192 for detection of early signs of virus replication after entry (Fig. 4D and 4E). Reminiscent of our  
193 results obtained with the lentiviral pseudotypes, B.1.1.7 initiated slightly lower levels of virus  
194 replication in Calu-3, A549-ACE2 and A549-ACE2/TMPRSS2 cells when compared to B.1 at the  
195 earliest time point at which subgenomic RNA production was detectable. ACE2 seems to be  
196 required for entry into A549, as levels of subgenomic viral RNA remained at background levels in  
197 parental A549. Entry of both viruses in Calu-3 cells depended on TMPRSS2 and furin and less on  
198 a cathepsin L-dependent pathway. In addition, clathrin inhibition resulted in decreased endocytic  
199 entry of B.1 and B.1.1.7 in Calu-3 cells (Fig. S2B), as was previously described for SARS-CoV  
200 (Wang et al., 2008). Inocula were back-titrated to ensure that equal amounts of virus were used  
201 for infection. In conclusion, B.1.1.7 spike-pseudotyped lentiviral particles and authentic B.1.1.7 are  
202 less efficient in entering susceptible target cells than their B.1 counterparts. This inefficiency may  
203 be related to the detected lower efficiency of spike processing.

204

205

206



207 **B.1.1.7 fails to escape from neutralizing antibodies and may dampen induction of innate**  
208 **immunity**

209 In accordance with reports by others (Bates et al., 2021; Supasa et al., 2021; Widera et al., 2021),  
210 B.1 infection- and vaccination-induced antibodies efficiently neutralized both B.1 and B.1.1.7 in a  
211 plaque reduction neutralization test, whereas such antibodies failed to effectively neutralize  
212 B.1.351 (Fig. 5A). Interestingly, binding of B.1.1.7 RBD, which differs from that of B.1 solely at one  
213 position (N<sup>501Y</sup>), to ACE2 in a surrogate neutralization test was slightly less sensitive to inhibition  
214 by antibodies from non-VOC convalescents and vaccinees when compared to antibodies raised  
215 following B.1.1.7 infection (Fig. 5B), indicating that antibodies targeting other regions than the RBD  
216 may contribute to the neutralization of infection. However, B.1.351 RBD was clearly more resistant  
217 to ACE2 binding inhibition than the B.1 and B.1.1.7 RBDs. These results suggest a large absence  
218 of escape from humoral immunity by B.1.1.7, as opposed to B.1.351.

219 We next hypothesized that B.1.1.7 has evolved superior ability to prevent or evade cell-  
220 intrinsic immunity. In the basal medium of infected differentiated bronchial airway epithelial cell  
221 cultures, no significant variant-specific differences were identified for various cytokines and other  
222 secreted proteins related to innate immunity, including IFN- $\alpha$ , IFN- $\gamma$ , and IP-10 (Fig. 5C). In  
223 infected Calu-3 cells, expression of *IFNB*, *MXA*, *CCL5*, *IL6* and *TNFA* was induced to similar levels  
224 by both variants (Fig. 5D). Interestingly, B.1.1.7 infection appeared to induce slightly lower levels  
225 of *IFNL* expression than B.1 (Fig. 5D), suggesting that B.1.1.7 may be able to suppress innate  
226 immune responses more efficiently.

227 In conclusion, absence of a detectable escape from neutralizing antibodies suggest that  
228 the enhanced B.1.1.7 transmissibility and pathogenicity *in vivo* involves other immune evasion  
229 mechanisms, potentially the ability to dampen induction of an antiviral state in infected cells.

230  
231 **B.1.1.7 and B.1.617.2 display a spike-dependent, ACE2-independent post-entry replication**  
232 **advantage in NCI-H1299 cells**

233 We reasoned that common cell culture models used up to this point may have failed to reflect the  
234 predominant spread of B.1.1.7 observed in the human population. Upon further exploration of  
235 susceptible cell lines, we identified that the human bronchial cell line NCI-H1299 (Phelps et al.,  
236 1996) supports B.1.1.7 growth with up to 24-fold higher efficiency than B.1 growth (Fig. 6A) in  
237 multi-cycle growth kinetics. The smaller plaque size of B.1.1.7 virus originating from Vero E6 cells  
238 (see Fig. 1A, lower panel) was corroborated with NCI-H1299 cell-derived virus.

239 Interestingly, there was no advantage in entry of lentiviral particles based on the B.1.1.7  
240 spike protein in NCI-H1299 cells (Fig. 6B). Also, there was no advantage for authentic SARS-  
241 CoV-2 B.1.1.7. virus in entering NCI-H1299 cells in a synchronized entry assay (Fig. 6C),  
242 indicating that the more efficient replication of B.1.1.7 may not necessarily be determined by  
243 improved entry. Even more surprisingly, replication of B.1.1.7 in NCI-H1299 cells occurred in the  
244 absence of detectable ACE2 protein (Fig. 6D), and *ACE2* and *TMPRSS2* mRNAs were only  
245 weakly expressed as compared to other SARS-CoV-2-susceptible cell cultures (Fig. 6E). In order  
246 to exclude the possibility that SARS-CoV-2 infection in NCI-H1299 cells was maintained by minute  
247 traces of ACE2 expressed below the detection limit of our system, we blocked ACE2 by antibodies.  
248 Individual incubation of Vero E6 and Calu-3 cells with three ACE2-neutralizing antibodies  
249 abolished and diminished SARS-CoV-2 infection, respectively (Fig. 6F, Fig. S3A-B). In contrast,  
250 anti-ACE2 antibody treatment did not and only very modestly modulate the susceptibility of NCI-  
251 H1299 to B.1 and B.1.1.7 SARS-CoV-2 infection (Fig. 5G and Fig. S3C), reinforcing the notion  
252 that this cell line supports infection via a largely ACE2-independent mechanism.

253 To analyze the specificity of the observed phenotypic changes for the spike protein, we  
254 generated, by reverse genetics, a Wuhan-1 virus with a D<sup>614</sup>G mutation (representing a B.1 virus,  
255 rB.1), as well as a Wuhan-1 virus carrying the full spike protein of B.1.1.7 (rB.1/Spike B.1.1.7).  
256 Moreover, we engineered a virus consisting of the B.1.1.7 backbone but the Wuhan-1 D<sup>614</sup>G spike,  
257 representing a prototypic B.1 spike (rB.1.1.7/Spike B.1, Fig. 5H-J). As expected, all recombinant  
258 viruses grew to similar titers in Vero E6 cells (Fig. 6H). In Calu-3 cells, growth of rB.1.1.7/Spike

259 B.1 was increased 9-fold over rB.1 at 72 hours post-infection, suggesting that the B.1.1.7  
260 backbone may confer replication advantages that do not depend on the spike protein (Fig. 6I). In  
261 NCI-H1299 cells, the virus expressing the B.1.1.7 spike in the backbone of B.1 grew to  
262 considerably higher titers (up to 65-fold increased titer) than the reciprocal virus and the original  
263 rB.1 virus (up to 15-fold increased titer, Fig. 6J). This suggests the replicative advantage of B.1.1.7  
264 in NCI-H1299 cells, while probably exerted on entry, is mediated by the spike protein.

265 We next reasoned that NCI-H1299 cell-specific increased viral growth may be a property  
266 that is shared by the current, predominating VOC Delta. In Calu-3 cells and in hBAEC cultures, a  
267 B.1.617.2 isolate grew to similar and increased titers, respectively, compared to B.1 and B.1.1.7  
268 (Fig. 6K and Fig. 6L). Remarkably, in multi-cycle infection experiments in NCI-H1299 cells,  
269 B.1.617.2 grew to 264 (min. 37 -max. 595)-fold higher titers than B.1 and 24 (min. 3 -max. 59)-  
270 fold higher titers than B.1.1.7, respectively (Figure 6M). Together, these data suggest that VOCs  
271 B.1.1.7 and B.1.671.2 may utilize partially common mechanisms of replication enhancement that  
272 are spike-dependent but do not improve entry efficiency.

273

274

275

276

## 277 **DISCUSSION**

278 To date, our understanding of molecular mechanisms that underlie the rapid spread and/or  
279 increased pathogenicity of SARS-CoV-2 VOCs is still in its infancy. As SARS-CoV-2 productively  
280 infects epithelial cells (Hou et al., 2020), and B.1.1.7-infected patients shed 10-fold more viral RNA  
281 (Jones et al., 2021), we hypothesized that B.1.1.7 has a replication advantage in human epithelial  
282 cell cultures. Although all immortalized, primary, and organoid cultures tested were highly  
283 permissive for SARS-CoV-2 infection, we failed to detect a B.1.1.7-specific growth advantage with  
284 one notable exception. Our findings corroborate reports by others showing a similar growth rate

285 of B.1.1.7 and B.1. viruses in common culture cells and primary human airway epithelial (HAE)  
286 cells (Brown et al., 2021; Touret et al., 2021; Ulrich et al., 2021). Despite monitoring infected  
287 cultures for up to ten days, we failed to observe temporally increased virus production in human  
288 organoid models as seen by others (Lamers et al., 2021). *In vivo*, B.1.1.7 has been proposed to  
289 display a fitness advantage in experimentally infected ferrets, in hACE2-K18Tg-transgenic mice  
290 and hACE2-KI transgenic mice (Ulrich et al., 2021), but not in Syrian hamsters (Nuñez et al., 2021;  
291 Ulrich et al., 2021). In line with these results, our data confirm the absence of significant growth  
292 differences between B.1.1.7 and B.1 variants in experimentally infected dwarf hamsters  
293 (Abdelnabi et al., 2021). However, a recent study did observe a transmission advantage of B.1.1.7  
294 upon low dose infection of Syrian hamsters (Mok et al., 2021). Finally, in intranasally infected  
295 African green monkeys, B.1.1.7 infection generated higher levels of viral RNA in the respiratory  
296 tract than B.1 infection (Rosenke et al., 2021). Together, the superiority of B.1.1.7 spread can be  
297 recapitulated in some animal models, but is not detectable in most cell culture systems.

298 B.1 SARS-CoV-2 productively infects susceptible cells via binding of the spike protein to  
299 ACE2 and TMPRSS2-mediated priming of spike (Hoffmann et al., Cell 2020). Compared to B.1  
300 viruses, B.1.1.7 viruses and B.1.1.7 spike-decorated lentiviral particles were equally or even less  
301 efficient in entering ACE2-expressing cell lines. Intriguingly, B.1.1.7 spike appeared to be more  
302 fusogenic in cell-cell fusion assays, in accordance with published work (Meng et al., 2021; Rajah  
303 et al., 2021). Proteolytic processing and viral packaging of coronaviral spike can be rate-limiting  
304 during infectious virus production. Our findings of reduced proteolytic cleavage in spike plasmid-  
305 transfected and SARS-CoV-2-infected cells are consistent with reduced furin-mediated  
306 processing of B.1.1.7 spike as shown by a biochemical peptide cleavage assay (Lubinski et al.,  
307 2021b), and challenge data reporting intact processing of cell-associated spike when expressed  
308 in spike plasmid-transfected cells (Mlcochova et al., 2021). Of note, the latter study used plasmids  
309 expressing spikes lacking 19 C-terminal amino acids, an experimental modification that has been  
310 widely accepted for artificial enhancement of cell surface expression and lentiviral incorporation

311 of spike (Yu et al., 2021), and that we refrained to adopt in order to maintain the expression context  
312 as physiological as possible. The observation of reduced processing translated into lower levels  
313 of lentivirus-associated spike, which may be the cause of the reduced infectivity of particles. Even  
314 though impaired maturation did not detectably alter virion-associated spike levels under our  
315 experimental conditions, we cannot exclude that it may still modulate the kinetics of virus particle  
316 secretion and/or the quality of secreted SARS-CoV-2 particles.

317         Whereas increased B.1.1.7 replication has been observed in patients, the initial phase of  
318 virus infection is difficult to capture in clinical observations due to late sampling, making cell culture  
319 studies potentially more insightful. On the contrary, cell cultures may fail to reflect differences in  
320 virus production in later stages of tissue infection due to the limiting effect of cytopathogenic effects  
321 *in vitro*. Our observation of reduced growth of B.1.1.7 in cell culture does not necessarily contradict  
322 clinical observations. We observed a slower ramp-up of virus production, delayed onset of  
323 cytopathic effect, and slightly reduced levels of *IFNL* expression for B.1.1.7, which, overall, is  
324 consistent with a stealthy invasion of tissue with initially limited production of PAMPs and more  
325 efficient evasion of cell-intrinsic innate immunity, as suggested by others. The previously reported  
326 transcriptional changes affecting the N gene reading frame, leading to expression of ORF9b  
327 potentially acting as an antagonist of IFN induction, as well as the reported increase of production  
328 of the IFN signaling antagonist ORF6, may contribute to this phenotype (Parker et al., 2021;  
329 Thorne et al., 2021). Accordingly, infected air-liquid interface cultures of alveolar type 2 cells  
330 produced more infectious B.1.1.7 virus when compared to B.1 only in a late phase of infection  
331 (Lamers et al., 2021). Also, replication of B.1 and B.1.1.7 variants in the upper respiratory tract of  
332 experimentally infected African green monkeys differed only from day 5 post-infection (Rosenke  
333 et al., 2021). Together, this suggests a delayed but extended phase of infectious B.1.1.7 virion  
334 shedding, potentially resulting in a prolonged phase of heightened transmission probability, which  
335 is also supported by preliminary viral load studies (Jones et al., 2021; Kissler et al., 2021a).

336 While cell-intrinsic immunity may be involved, its onset and extent is still dependent on  
337 fundamental factors such as receptor usage and cell entry, often reflected by changes in the spike  
338 protein. Paradoxically, ACE2 expression levels in the respiratory tract are low and common cell  
339 culture models may not fully recapitulate *in vivo* properties of primary target tissues of SARS-CoV-  
340 2 infection (Hikmet et al., 2020). Our exploration of other cell cultures may thus have uncovered a  
341 cell line that has remained understudied with regard to SARS-CoV-2 infection phenotypes. While  
342 caveats and limitations of neoplastic cell lines apply, NCI-H1299 cells yielded higher levels of  
343 replication and infectious virus production not only for B.1.1.7, but also for B.1.617.2. This cell line  
344 of epithelial morphology is devoid of detectable ACE2 protein and remains susceptible to SARS-  
345 CoV-2 infection even in the presence of ACE2-neutralizing antibodies, suggesting the existence  
346 of an alternative, but not variant-specific mode of entry. This finding is reminiscent of a recent  
347 study (Puray-Chavez et al., 2021) that identified SARS-CoV-2 infection of the H522 lung cell line  
348 in an ACE2-independent fashion (in this study the alternative way of infection could only be utilized  
349 by viruses carrying an E<sup>484</sup>D substitution within the spike protein RBD).

350 Surprisingly, while experiments with reciprocal chimeras established that the B.1.1.7  
351 spread advantage in NCI-H1299 cells is mediated to a large extent by its spike, the entry process  
352 *per se* was similarly or even less efficient for B.1.1.7 than for B.1. Notably, a virus consisting of  
353 the B.1.1.7 backbone with B.1 spike displayed a slightly better replication efficiency than the  
354 original B.1 virus in type-I IFN-competent Calu-3 cells, confirming that other genetic determinants  
355 of B.1.1.7 beyond spike contribute to enhanced replication. These findings suggest a post-entry,  
356 yet largely spike-dependent replication advantage of B.1.1.7 that manifests itself in NCI-H1299  
357 cells. Remarkably, we conducted preliminary studies of replication for B.1.617.2 and found a highly  
358 similar phenotype, i.e., a similar level of replication in common ACE2-positive cell lines but a  
359 specific increase of replication in NCI-H1299 cells that does not seem to be determined by  
360 improved entry. In addition, B.1.617.2 displayed a spreading advantage in human BAECs that  
361 manifested itself not before four days post-infection. The extent of growth advantage for B.1.617.2

362 in NCI-H1299 cells was higher than for B.1.1.7, which would be expected given the observed  
363 differences in epidemic growth rates for these VOCs. More work will be necessary to understand  
364 the nature of the alternative entry mechanism, the identity of the entry-independent and variant-  
365 specific difference in replication as a function of spike, as well as the possibility that two VOCs  
366 may have undergone convergent evolution towards utilization of this same unknown mechanism.  
367 Also, whether the ACE2-independent entry is linked to the replication advantage, e.g. by  
368 potentially more efficient virion release due to ACE2 scarcity or absence, remains unclear at this  
369 time. Mere absence of ACE2 expression is not sufficient for B.1.1.7-specific growth advantage as  
370 illustrated by the refractoriness of ACE2-negative A549 cells to SARS-CoV-2 infection. Future  
371 studies are required for the identification of a hypothetical alternative receptor of SARS-CoV-2 and  
372 for the elucidation of the specific cellular environment of NCI-H1299 cells that confers a replication  
373 advantage to B.1.1.7 and B.1.617.2 SARS-CoV-2.

374

## 375 **MATERIALS AND METHODS**

376

### 377 *Samples from COVID-19 patients and vaccinees*

378 Sera were available through a study on convalescent plasma donors, who recovered from mild to  
379 moderate COVID-19 before the emergence of any SARS-CoV-2 VOCs (Schlickeiser et al., 2020).  
380 Additional sera were available through a study on SARS-CoV-2 infection and COVID-19  
381 vaccination (Hillus et al., 2021), a prospective observational cohort study Pa-COVID-19 (Thibeault  
382 et al., 2021) including its study arm RECAST (Understanding the increased resilience of children  
383 compared to adults in SARS-CoV-2 infection) and from RT-PCR confirmed B.1.1.7-infected  
384 patients. The use of clinical samples (sera) was approved by the Institutional Review Board at  
385 Charité - Universitätsmedizin Berlin (EA1/068/20, EA2/092/20 and EA2/066/20) and is in  
386 accordance with the Berlin State Hospital Law, allowing for pseudonymized scientific analysis of  
387 routine patient data.

388

389 *Cells and culture conditions*

390 A549 parental (ATCC CCL-185), A549-ACE2, A549-TMPRSS2, A549-ACE2 + TMPRSS2  
391 (Widera et al. 2021), Caco-2 (ATCC HTB-37), Calu-3 (HTB-55), CHO (HIV Reagent Program  
392 ARP-2238), NCI-H1299 (ATCC CRL-5803), HEK-293T (ATCC CRL-3216), TZM-bl (HIV Reagent  
393 Program ARP-8129) and Vero E6 (ATCC CRL-1586) cells were maintained at 37°C and 5% CO<sub>2</sub>  
394 in a humidified atmosphere and cultured in Dulbecco's Modified Eagle's Medium (DMEM,  
395 ThermoFisher Scientific) supplemented with 10% fetal bovine serum (FBS, ThermoFisher  
396 Scientific), 1% non-essential amino acids 100x concentrate (NEAA, ThermoFisher Scientific) and  
397 1% sodium pyruvate 100 mM (NaP, ThermoFisher Scientific) and split twice a week. For seeding  
398 and cultivation, cells were washed with phosphate buffered saline (PBS, ThermoFisher Scientific)  
399 and detached with 0.05% trypsin-EDTA solution (ThermoFisher Scientific).

400

401 *Virus strains*

402 Infection experiments were done with BetaCoV/Munich/ChVir984/2020 (B.1, EPI\_ISL\_406862),  
403 hCoV-19/Germany/BY-ChVir21652/2020 (B.1.1.7/v1, EPI\_ISL\_802995), BetaCoV/Baden-  
404 Wuerttemberg/ChVir21528/2021 (B.1.1.7/v2, EPI\_ISL\_754174) and hCoV-19/Germany/BW-  
405 ChVir22131/2021 (B.1.351, EPI\_ISL\_862149) . A virus of the B.1.617.2 ("Delta") clade (hCoV-  
406 19/Germany/SH-ChVir25702\_4/2021) was isolated from a patient in Schleswig-Holstein,  
407 Germany, and its sequence deposited in GISAID (EPI\_ISL\_2500366). Due to the observation of  
408 rapid cell culture-induced mutations at the spike polybasic furin cleavage motif (spike amino acid  
409 no. 681-685), all virus stocks were sequenced by next generation sequencing to confirm the  
410 absence of minority variants. Unless otherwise stated, only virus stocks with no or variant  
411 frequencies below 20% of all sequence reads were included in downstream infection experiments.  
412 Virus isolation and all SARS-CoV-2-related infection experiments were performed under biosafety  
413 level-3 (BSL-3) conditions with enhanced respiratory personal protection equipment.



414

415 *Plasmids*

416 Codon-optimized, C-terminally tagged spike cDNAs in pCG were generated using pCG-SARS-  
417 CoV-2 spike Wuhan as a template (Hoffmann et al., 2020) in which the N-terminus was repaired  
418 and D<sup>614</sup>G was introduced via site-directed mutagenesis. The individual B.1.1.7-characteristic  
419 mutations were introduced individually and in combination by site-directed mutagenesis. All  
420 constructs were confirmed by Sanger sequencing.

421

422 *Virus isolation*

423 Virus was isolated from naso- or oropharyngeal swabs using Vero E6 cells. Cells were seeded at  
424 a density of 175,000 cells per well in 24-well plates one day prior to isolation. For virus isolation,  
425 the medium was removed and cells were rinsed once with 1x PBS (ThermoFisher Scientific) and  
426 inoculated with 200 µl of swab sample. After one hour incubation, 800 µl of isolation medium  
427 (DMEM, supplemented with 2% FBS, 1% penicillin-streptomycin and 1% amphotericin B,  
428 ThermoFisher Scientific) was added to each well. Cells were monitored for cytopathic effects  
429 (CPE) every day. Four days post-inoculation, viral RNA was isolated and quantified from the  
430 supernatant as described below. Isolation success was determined when CPE was detectable  
431 and viral RNA concentrations were above a threshold of 100,000 genome equivalents per µl. Virus  
432 stocks were produced from all positive cultures.

433

434 *Virus stock production*

435 Vero E6 cells were seeded in T175 tissue culture flasks allowing the cells to reach 90% confluence  
436 on the following day. Cells were washed once with PBS and inoculated with 100 µl of low passage  
437 (passage 1-2) virus stock solution (approximately 1,000,000 PFU per ml) in 20 ml virus infection  
438 medium (DMEM supplemented with 2% FBS, 1% NEAA, 1% sodium phosphate). Three days post-  
439 inoculation, supernatant was harvested and virus particles were purified from cytokines and

440 concentrated using Vivaspin 20 (Sartorius, filtration units with a size exclusion of 100 kDa)  
441 according to the manufacturer's instructions. Virus concentrate was resuspended in 2-3 ml PBS,  
442 diluted 1:2 in virus preservation medium (0.5% gelatine in OptiPRO serum free medium) and  
443 stored at -80°C. Infectious titers were determined in three independent plaque titration  
444 experiments and viral RNA concentration was quantified by real-time RT-PCR (E gene assay). All  
445 stocks were sequenced by next generation sequencing methods and the absence of additional  
446 mutations was confirmed to occur in less than 20% of the virus-specific reads.

447

#### 448 *Virus infection and virus growth kinetics in cell cultures*

449 Vero E6, Caco-2, NCI-H1299 and A549 cells were seeded at a density of 350,000 cells per ml  
450 and Calu-3 cells at a density of 500,000 cells per ml one day prior to infection. For infection, virus  
451 stocks were diluted in OptiPRO SFM (ThermoFisher Scientific) serum-free medium according to  
452 the desired MOI. For virus adsorption 200 µl (24-well) or 1 ml (6-well) of virus master mix was  
453 added to the cells and incubated at 37°C in a 5% CO<sub>2</sub> atmosphere with 95% humidity. After one  
454 hour, virus dilutions were removed, cells were washed three times with PBS and wells were refilled  
455 with DMEM infection medium. To determine infectious titers, supernatants were harvested at the  
456 indicated time points, and diluted 1:2 in virus preservation medium and stored at -80°C until  
457 conducting plaque titration assay.

458

#### 459 *Infection bronchial epithelial cells*

460 Human bronchial airway epithelial (hBAE, SmallAir™) cell cultures applied in Figure 2B were  
461 obtained from Epithelix Sàrl, Geneva Switzerland. All other experiments were conducted with  
462 hBAECs isolated from explanted lungs which were obtained from the Hannover Lung Transplant  
463 Program after patients informed consent, ethical vote 2923-2015. For isolation of hBAECs, human  
464 bronchial tissue was cut into small pieces in Hank's buffer (Thermo Fisher Scientific) containing

465 0.18% protease XIV and incubated for two hours at 37°C. After thorough pipetting with a 25/50 ml  
466 serological pipette, cell solution was filtered through a 100 µm cell strainer (Corning) to remove  
467 clumps and 10 ml RPMI supplemented with 10% FCS (Thermo Fisher Scientific) was added. After  
468 centrifugation for 10 min at 500g and 4°C, supernatant was removed and cells were resuspended  
469 in SAGM™ (Lonza) + Primocin (InvivoGen) + Penicillin-Streptomycin (P/S) (Sigma-Aldrich). For  
470 air-liquid interface cultures, 200.000 hBAECs were seeded onto PureCo- (Advanced BioMatrix)  
471 coated 12 well inserts (Greiner Bio-One) in SAGM™ + Primocin + P/S. 48 hours post seeding,  
472 culture medium in apical and basal chamber was changed to PneumaCult-ALI medium  
473 (STEMCELL Technologies). Air-Lift was performed 48 hours later by gently removing medium  
474 from the apical chamber. Homogenous distributed cilia were visible latest three weeks after air-lift  
475 and inserts were used for infections.

476 For infection, the apical surface was washed up to five times with 200 µl PBS to remove  
477 mucus. Virus stocks were diluted in OptiPRO and hBHAEC were infected with an absolute infectious  
478 dose of 50,000 PFU (SmallAir™) or 100,000 PFU (in-house hBAECs). Cells were incubated for  
479 1.5 hours at 37°C in a 5% CO<sub>2</sub> atmosphere with 95% humidity. After adsorption, virus dilutions  
480 were removed and the cells were washed three times with 200 µl PBS. Samples were taken at  
481 the indicated time points from the apical surface by applying 200 µl PBS to the cells. PBS was  
482 incubated on the cells for 10 minutes at 37°C to ensure that virus particles diffuse into the solution  
483 before collecting the supernatant samples. Basolateral medium (SmallAir™ Medium for SmallAir™  
484 cultures or PneumaCult-ALI for in-house hBAECs) was exchanged every 48 hours.

485

#### 486 *Infection of nasal airway epithelial cells*

487 Primary human nasal airway epithelial cells (hNAECs) were collected from healthy individuals by  
488 nasal brushings. Informed consent was obtained from all volunteers and the study was approved  
489 by the Charité Ethics Committee (EA2/161/20, EA2/066/20). Cultivation of hNAECs was

490 performed as previously described (Gentsch et al., 2017). Briefly, cells were expanded using the  
491 conditionally reprogrammed cell (CRC) culture method, then p.2 or p.3 cells were seeded on  
492 porous Transwell or Snapwell 1.1 cm<sup>2</sup> supports (Corning) in UNC-ALI medium and differentiated  
493 at air-liquid interface for at least three weeks prior to infection. Approximately 200,000 hNAECs  
494 were infected with SARS-CoV-2 B.1 or B.1.1.7/v2 at an MOI of 0.1 in 150 µl D-PBS containing 0.3  
495 % BSA for one hour at 37°C in a 5% CO<sub>2</sub> atmosphere with 95% humidity. Afterwards, cells were  
496 washed apically with D-PBS and fresh medium was added basolaterally. Samples were taken at  
497 the indicated time points from the apical surface by applying 100 µl D-PBS to the cells. PBS was  
498 incubated on the cells for 30 minutes at 37°C to ensure that virus particles diffuse into the solution  
499 before collecting the supernatant samples. A 250 µl sample was taken from the basolateral side  
500 and medium was replenished. All samples were titrated on Vero E6 cells by plaque assay to  
501 determine infectious titers.

502

### 503 *Infection of lung organoids*

504 Human lung organoids were established as previously published (Youk et al., 2020). Informed  
505 consent was obtained from all volunteers and the study was approved by the Charité Ethics  
506 Committee (project 451, EA2/079/13). For infection, Matrigel was liquefied and removed on ice  
507 and organoids were broken up by repeated resuspension using a disposable syringe with needle  
508 (27G). Virus stocks were diluted at the desired MOI in organoid infection medium (Advanced  
509 DMEM/F12 with 10 mM HEPES and 1x GlutaMax, ThermoFisher Scientific) and dilution was  
510 inoculated for one hour at 37°C and in 5% a humidified CO<sub>2</sub> atmosphere. After infection, organoids  
511 were washed twice with PBS and resuspended in Cultrex 3-D Culture Matrix (R&D Systems) for  
512 30 min before organoid medium (as described above) was added. Samples were taken from  
513 supernatants at the indicated time points and analyzed by plaque titration assay as described  
514 previously.

515

516 *Infection of intestinal organoids*

517 Human normal colon organoids were established from non-cancerous parts of colorectal cancer  
518 resection tissue and cultured as previously published (Sato et al., 2011) under the ethics approval  
519 no. EA4/164/19 (to Markus Morkel). For infection studies, organoids were harvested, Matrigel  
520 (Corning, #356231) was removed by resuspension and centrifugation. Subsequently, organoids  
521 were infected in solution with an MOI of 0.05 (SARS-CoV-2 WT and B.1.1.7 strains) at 37°C for  
522 one hour. Infected organoids were seeded in Matrigel and were supplemented with medium.  
523 Samples were taken from supernatants at 24, 48 and 72 hours post-infection and analyzed by  
524 real-time RT-PCR as described (Corman et al., 2020).

525

526 *Synchronized infection experiments*

527 Synchronized infection experiments were performed to determine entry efficiency of the virus  
528 variants. Infection of cells was performed on ice and cells were immediately transferred to 4°C for  
529 one hour after virus dilutions were added to ensure synchronized virus uptake and start of  
530 replication. After virus adsorption, cells were washed five times with PBS to remove excess of  
531 virus particles. Cells were lysed either immediately, or incubated with infection medium until four  
532 or six hours post-infection. At the indicated time points, medium was removed and cells were lysed  
533 with MagNA Pure 96 external lysis buffer (Roche, Penzberg, Germany). Isolation of RNA from cell  
534 lysates and quantitative RT-PCR on subgenomic nucleocapsid RNA was performed as described  
535 elsewhere (Corman et al., 2020; Kreye et al., 2020). Entry inhibitors were dissolved in DMSO in  
536 the indicated concentrations, added one hour prior to virus infection and were supplied for the  
537 entire duration of the experiment.

538

539 *Plaque assay*

540 Plaque assay was performed to determine the titer of stocks and the infectious dose of  
541 supernatants harvested from infected cells. 175.000 Vero E6 cells were seeded in a 24-well plate

542 one day prior to infection. After washing the cells once with PBS, cells were inoculated in  
543 duplicates with 200  $\mu$ l of 1:10 serially diluted cell culture supernatants from infected cells. After  
544 adsorption for one hour at 37°C, the virus dilutions were removed and 500  $\mu$ l of a highly viscous  
545 overlay (1:1 mix of 2.4% avicel and 2x concentrated DMEM supplemented with 5% FBS, 2%  
546 NEAA and 2% NaP) was added to each well. The overlay was discarded at three days post-  
547 infection. Cells were fixed for 30 min in 6% formaldehyde, washed once with PBS and stained for  
548 15 min with crystal violet solution. Plaques were counted from one to two dilutions for which distinct  
549 plaques (in a range between 1-100 plaques) were detectable. To calculate the titer, the number  
550 of all plaques counted was divided by the respective inoculation volume and multiplied with the  
551 inversed dilution factor.

552

### 553 *Competition assay*

554 Calu-3 cells were infected in 24-well plates with a mixture of two SARS-CoV-2 variants, using  
555 three different ratios (1:1 and 9:1 and 1:9) and an initial, total infectious dose of 10.000 PFU  
556 (corresponding to an MOI of 0.04). Serial infections were performed by sampling the supernatant  
557 of the previous passage at 24 hours post-infection and infecting naive Calu-3 cells with a 1:50  
558 dilution of this sample. This process was repeated until completion of five passages. As a control  
559 for genome stability over five passages, single infections were performed. Viral RNA was isolated  
560 from the initial inoculum and from the supernatant of all five passages. To confirm that the virus is  
561 detectable over five passages, concentration of viral RNA was analyzed by quantitative RT-PCR  
562 (E gene assay) from each passage. To determine the variant frequency in each passage, RNA  
563 samples were sequenced using next generation sequencing techniques (Illumina technology). For  
564 virus sequence analysis, the raw sequences were trimmed, matched and presorted for SARS-  
565 CoV-2-specific sequence reads. The processed sequence reads were mapped to the  
566 BetaCoV/Munich/ChVir984/2020 genome (here referred to as SARS-CoV-2 2019-nCoV strain) in  
567 Geneious (version 9.1.8). The two virus variants in each sample were distinguished from each

568 other by their lineage-specific mutations. For evaluation, the relative variant frequencies were  
569 calculated for each variable position. This was conducted for a total of 19 lineage-specific  
570 mutations which were distributed over the entire genome.

571

#### 572 *Next generation sequencing*

573 Viral RNA was extracted using MagNA Pure 96 System (Roche, Penzberg, Germany) according  
574 to the manufacturers' recommendations. The RNA-seq library was prepared from viral RNA  
575 extracts using the KAPA RNA HyperPrep Kit (Roche, Penzberg, Germany) and KAPA DI adaptors  
576 according to the manufacturers' instructions. The RNA library was subjected to next generation  
577 sequencing on a NextSeq System (Illumina) using a NextSeq 500/550 v2.5 Kit (Illumina).  
578 Sequences were analyzed using the geneious software, version 9.1.8, and sequence reads were  
579 assembled by mapping reads to the respective reference sequences.

580

#### 581 *Live cell imaging*

582 For live cell imaging, Vero E6 cells were infected with SARS-CoV-2 984, B1.1.7 Passau or B1.1.7  
583 Baden-Württemberg at an MOI of 0.01 or 0.001 for one hour with subsequent replacement of the  
584 inoculum with full culture medium. Cells were imaged with the Zeiss LSM800 Airyscan Confocal  
585 Microscope over 72 hours with 30 min intervals in a 5% CO<sub>2</sub> supplemented, humidified  
586 environment. Images were analyzed for the onset of visible cytopathic effects and merged using  
587 Zeiss ZEN Blue 3.0 and ImageJ 1.53c.

588

#### 589 *In vivo infections*

590 Animals: Animal procedures were performed according to the European Guidelines for Animal  
591 Studies after approval by the relevant state authority (Landesamt für Gesundheit und Soziales,  
592 Berlin, permit number 0086/20). Per group, nine male and female Roborovski dwarf hamsters

593 (*Phodopus roborovskii*) obtained via the German pet trade were used. Animals were housed in  
594 groups of three-six hamsters in GR-900 IVC cages (Tecniplast, Buguggiate, Italy) and provided  
595 with bountiful enrichment and nesting materials (Carfil, Oud-Turnhout, Belgium). Hamsters of the  
596 same sex were randomly distributed into experimental groups and individually marked with a  
597 subcutaneously implanted IPTT-300 transponder (BMDS, Seaford (DE), USA) that allows remote  
598 identification and measurement of body temperature.

599 Infection and transmission experiments: To determine virus production *in vivo*, nine  
600 hamsters were inoculated with 100,000 PFU of either WT or B.1.1.7. as previously described  
601 (Trimpert et al., 2020). Briefly, anaesthetized hamsters received 100,000 PFU SARS-CoV-2 in 20  
602  $\mu$ L MEM by intranasal instillation. At 24 hours post-inoculation, contact to uninfected hamsters  
603 was enabled by placing three infected animals into a cage containing three uninfected animals of  
604 the same sex. Hamsters were monitored twice daily for clinical signs of infection. Body weight and  
605 temperature was recorded daily. Hamsters were sacrificed to determine virological parameters of  
606 infection on days 2, 3, 5 and 7 post-infection or contact, or once an individual reached a defined  
607 humane endpoint.

608 Virus titrations, RNA extractions and RT-qPCR: To determine virus titers from 50 mg of  
609 lung tissue, tissue homogenates were prepared using a bead mill (Analytic Jena) and 10-fold serial  
610 dilutions were prepared in MEM, which were then added to Vero E6 cells in 12-well plates. The  
611 dilutions were removed after two hours and cells were overlaid with 1.25% microcrystalline  
612 cellulose (Avicel) in MEM supplemented with 10% FBS and penicillin/streptomycin. Two days  
613 later, cells were formalin-fixed, stained with crystal violet, and plaques were counted. RNA was  
614 extracted from 25 mg of lung homogenates and oropharyngeal swabs using the innuPREP Virus  
615 RNA kit (Analytic Jena). Viral RNA copies were quantified in 10% of the obtained eluate volume  
616 with a one-step RT-qPCR reaction using a standard curve and the Luna Universal Probe One-  
617 Step RT-qPCR kit (New England Biolabs) and previously published TaqMan primers and probe  
618 (Corman et al., 2020) on a StepOnePlus RealTime PCR System (Thermo Fisher Scientific).



619  
620 *Reverse genetics*  
621 We employed the previously described in-yeast transformation-associated recombination (TAR)  
622 cloning method (Thi Nhu Thao et al., 2020) for the generation of infectious SARS-CoV-2 B.1.1.7  
623 cDNA clones. Overlapping DNA fragments were obtained by first strand cDNA synthesis of viral  
624 RNA extracts from infected Vero E6 cells using SuperScript III reverse transcriptase (Invitrogen)  
625 followed by a nested Phusion PCR (Invitrogen). Primers for TAR fragment generation were used  
626 as previously described (Thi Nhu Thao et al., 2020) with B.1.1.7-specific deviations for two  
627 fragments, as specified in Table S1. For generation of the D<sup>614</sup>G mutant we performed site-  
628 directed mutagenesis PCR (NEB) on synthetic viral subgenomic fragments cloned into pUC57  
629 vectors (Thi Nhu Thao et al., 2020). Assembly of purified DNA fragments was performed by TAR  
630 cloning as previously described (Thi Nhu Thao et al., 2020). Clones were screened for correctly  
631 assembled DNA fragments by multiplex PCR using the QIAGEN Multiplex PCR kit (QIAGEN)  
632 according to the manufacturers' instructions. Clones tested positive for all junctions were  
633 expanded, plasmid DNA was extracted, linearized and subjected to T7-based *in vitro* RNA  
634 transcription (Thermo Fisher Scientific). Capped viral RNA was electroporated into baby hamster  
635 kidney cells and supernatant was subsequently transferred to Vero E6 cells one day after  
636 electroporation for stock production. Successful virus rescue was confirmed by SARS-CoV-2-  
637 specific RT-PCR. Virus stocks were harvested three days post-infection, purified and deep  
638 sequenced as described above.

639  
640 *Isolation of viral RNA and quantitative real-time RT-PCR assay*  
641 For isolation of viral RNA, 50 µl of supernatant was diluted in 300 µl of MagNA Pure 96 external  
642 lysis buffer (Roche, Penzberg, Germany). All samples were heat inactivated for ten minutes at  
643 70°C prior to export from the BSL-3. Isolation and purification of viral RNA was performed using  
644 the MagNA Pure 96 System (Roche, Penzberg, Germany) according to the manufacturers'

645 recommendations. Viral RNA was quantified using real-time RT-PCR (E gene assay) as previously  
646 described (Corman et al., 2020).

647  
648 *Isolation of total RNA, cDNA synthesis and quantitative PCR*  
649 For extraction of total RNA, the MagNa Pure 96 System (Roche, Penzberg, Germany) was used  
650 according to the manufacturers' instructions. Briefly, cells were washed once with PBS before 350  
651  $\mu$ l of external lysis buffer (Roche, Penzberg, Germany) was added to the cells. Lysed cells were  
652 resuspended 2-3 times and transferred to the reaction tube. Samples were heat-inactivated for  
653 ten min at 70°C and exported from the BSL-3 laboratory. For quantitative RT-PCR, a 12.5  $\mu$ l  
654 reaction with 2.5  $\mu$ l RNA was done with the SuperScript III one-step reverse transcriptase-PCR  
655 system (Invitrogen) with the Platinum Taq DNA polymerase according to the manufacturers'  
656 protocol and the primers indicated in Table S2. Probes contained a 5' FAM-520 reporter dye and  
657 a ZEN/Iowa Black FQ 3' quencher (Integrated DNA technologies). The RT-PCR was performed  
658 using a thermocycling protocol with reverse transcription for 15 min at 55°C and a subsequent  
659 denaturation step for two min at 95°C to restore *Taq* DNA polymerase activity, followed by PCR  
660 amplification by 45 cycles of 95°C for 15 sec and 58°C for 30 sec. Fluorescence signals were  
661 detected after the elongation step of each cycle. The mean fold change in gene expression was  
662 calculated by the delta-delta ct method and by using expression of TATA-binding protein (TBP)  
663 as a reference.

664 To determine early virus replication, a quantitative RT-PCR targeting the subgenomic RNA  
665 encoding the nucleocapsid (sgN) was performed. Viral RNA was extracted from cell lysates which  
666 were previously lysed by external lysis buffer (Roche, Penzberg, Germany) as described above.  
667 RT-PCR was done with the following primers and probe: nCoV sgN Fwd: 5'-CGA TCT CTT GTA  
668 GAT CTG TTC TC-3', nCoV sgN Rev: 5'-CAG TAT TAT TGG GTA AAC CTT GG-3' and nCoV  
669 sgN prb: 5'-56-FAM/ CAG TAA CCA GAA TGG AGA ACG CAG /3BHQ-1-3 ((Kreye et al., 2020))'.

670 For quantification, values were normalized to the housekeeping gene TBP levels by delta ct  
671 method.

672  
673 *Tat-mediated cell-cell fusion assay*  
674 CHO and TZM-bl cells were retrieved from the NIH AIDS Reagent Program and propagated as  
675 recommended. CHO cells were transiently transfected with expression plasmids for HIV-1 Tat and  
676 individual pCG-spike-HA or empty vector control for 48 hours, using Lipofectamine LTX Reagent  
677 with PLUS™ Reagent (Invitrogen). TZM-bl cells, stably expressing LTR-driven luciferase, were  
678 transfected with a plasmid encoding human ACE2 and human myc-TMPRSS2. CHO and TZM-bl  
679 cells were cocultured for eight hours. Subsequently, cells were washed once with PBS, lysed  
680 using cell culture lysis buffer (Promega), and Tat-dependent increase of luciferase enzyme activity  
681 in cell lysates was determined with the Luciferase Assay system (Promega). Luminometric activity  
682 was analyzed with a Mithras luminometer.

683  
684 *Lentivirus production and transduction experiments*  
685 SARS-CoV-2 spike-HA-pseudotyped lentiviral particles were produced in triple-transfected  
686 HEK293T cells. Cells were transfected with individual pCG-SARS-CoV-2 spike-HA plasmids, the  
687 HIV-1-based packaging plasmid deltaR8.91 (Zufferey et al., 1997) and the luciferase transfer  
688 plasmid pCSII-luciferase (Agarwal et al., 2006) via calcium phosphate precipitation. Virus-  
689 containing supernatant was harvested 40 and 64 hours post transfection and sterile-filtered.  
690 Particles were concentrated via ultracentrifugation through a 20% sucrose cushion. Indicated cell  
691 lines were transduced for 72 hours with identical p24 capsid equivalents as quantified by  
692 immunoblotting of particle lysates. Transduction efficiency was quantified luminometrically three  
693 days post-transduction.

694  
695 *Immunoblotting*

696 To determine incorporation and processing of Spike in lentiviral particles, transduced cells and  
697 lentiviral particles were lysed with M-PER Mammalian Protein Extraction Reagent (Pierce) and  
698 Triton X-100, respectively. The lysate was mixed with Laemmli buffer and boiled for ten minutes  
699 at 95°C. Proteins were separated on a 10% SDS-PAGE and immobilized on a nitrocellulose  
700 membrane (GE Healthcare) using the Trans-Blot Turbo system (BioRad). Blocked membranes  
701 were incubated with the following antibodies: mouse anti-HIV-1 p24 capsid (ExBio, 1:1000), rabbit  
702 anti-S2 spike (Novusbio, NB100-56578, 1:1000), mouse anti-HA (Sigma, H3663, 1:1400), rabbit  
703 anti-tubulin (Cell Signaling Technology, 2144S, 1:1000). Secondary antibodies conjugated to  
704 Alexa680/800 fluorescent dyes were used for detection and quantification by Odyssey Infrared  
705 Imaging System (LI-COR Biosciences). Spike processing efficiency was calculated as the  
706 percentage of S2 from total spike signal. Relative levels of spike-HA abundance in lentiviral  
707 pseudotypes were quantified by calculating the signal intensity of S2-HA per HIV-1 p24 capsid.

708 To determine the processing and incorporation of spike from infected cells, cells and  
709 purified virus particles were lysed with RIPA (ThermoFisher Scientific) buffer supplemented with  
710 complete protease inhibitor cocktail (Roche) for 30 min at 4°C. Subsequently, lysates were  
711 centrifuged for 15 min at 4°C and 15,000 rpm to remove cell debris. The supernatants were mixed  
712 with 4x Laemmli buffer, which was supplemented with 10% beta-mercaptoethanol, and lysates  
713 were boiled for ten minutes at 95°C to ensure protein denaturation and virus inactivation. Protein  
714 concentration was determined by BCA protein assay (ThermoFisher Scientific) and 20 µg total  
715 protein was loaded. Proteins were separated by SDS-PAGE on a 6% gel and transferred to a  
716 nitrocellulose membrane (0.45 µm pore size, GE Healthcare) by Trans-Blot Turbo system  
717 (BioRad). Membranes were blocked with 5% dried milk in 0.1% PBS-Tween (0.9% NaCl, 10 mM  
718 Tris-HCl [pH 7.5], 0.1% Tween 20) for 30 min at room temperature. Blocked membranes were  
719 incubated with the following antibodies: rabbit anti-S2 spike (Novusbio, NB100-56578, 1:1000),  
720 rabbit anti-SARS-CoV-2 nucleocapsid (GeneTex, GTX135361, 1:1000). Secondary antibodies  
721 conjugated with horseradish peroxidase (HRP) were used for chemiluminescence-based

722 detection by Fusion Fx7 (PepLab Biotechnologie GmbH). Detection was performed using  
723 SuperSignal™ West Femto substrate (ThermoFisher Scientific). Quantification was done by the  
724 use of ImageJ 1.48v software. Spike processing efficiency was calculated as the percentage of  
725 S2 from total spike signal. Relative levels of spike abundance in concentrated virion preparations  
726 were quantified by calculating the signal intensity of S2 per nucleocapsid.

727

#### 728 *MagPix Luminex*

729 To assay cytokine levels in airway epithelial cell supernatant, 25 µl of supernatant were sampled  
730 prior to infection and at 24 h and 48 h post-infection with SARS-CoV-2 WT, B.1.1.7/v1, and  
731 B.1.1.7/v2. Cytokine quantification was performed using a Human Cytokine/Chemokine/Growth  
732 Factor Panel A 48-Plex Premixed Magnetic Bead Multiplex Assay (Merck Millipore), using the  
733 Luminex MAGPIX System in 96-well plate format, according to the manufacturer's instructions.  
734 Plate washing steps were performed using HydroFlex Microplate Washer (Tecan). Calibration,  
735 verification, and quality control checks were met for all of the analytes. However, Analyte 15 (FGF-  
736 2) was omitted because its standard curve had an R<sup>2</sup> value of 0.82 and Analyte 53 (IL-17F) was  
737 omitted because it had a high limit of detection and several extreme outliers from the rest of the  
738 dataset. All other analytes were reported.

739

#### 740 *PRNT assays*

741 Plaque reduction neutralization tests (PRNT) were performed as previously described (Kreye et  
742 al., 2020; Wölfel et al., 2020). Briefly, heat-inactivated sera were serially diluted starting at 1:40 in  
743 OptiPro, mixed 1:1 with 200 µL virus solution containing 200 plaque forming units of SARS-CoV-  
744 2 (strains B.1, B.1.1.7/v1, and B.1.351) and 200 µL of the mix were incubated in duplicates on  
745 Vero E6 cells (160,000 cells per well) seeded in 24-well plates on the previous day. After one hour  
746 incubation at 37°C, the supernatant was discarded and cells were washed with PBS and overlaid  
747 with 1.2% Avicel solution in supplemented DMEM. After three days at 37°C, the supernatants

748 were removed and cells were inactivated and fixed with a 6% formaldehyde/PBS solution and  
749 stained with crystal violet. Serum dilutions with a mean plaque reduction of 50% and 90% are  
750 referred to as PRNT<sub>50</sub> or PRNT<sub>90</sub>. For numerical calculations, titers <40 were set to 20, and titers  
751 >1:640 were set to 1:1,280.

752

### 753 *Surrogate neutralization assay*

754 Neutralizing capacity of patients' sera against B.1, B.1.1.7, and B.1.351 was assessed by a  
755 surrogate virus neutralization test (cPass Assay, Medac, Wedel, Germany) as described  
756 previously (Momsen Reincke et al., 2021; von Rhein et al., 2021). Briefly, sera of infected and  
757 vaccinated patients were diluted 1:10 with sample dilution buffer, mixed 1:1 with B.1-HRP-RBD,  
758 B.1.1.7-HRP-RBD, and B.1.351-HRP-RBD (provided by Medac, Wedel, Germany) solution and  
759 incubated at 37°C for 30 minutes. Afterwards, the mixture was added to the hACE2-coated plate  
760 and incubated at 37°C for 15 minutes. After washing, 3',3',5',5'-tetramethylbenzidine solution was  
761 added, and the plate was incubated in the dark at room temperature for 15 minutes. Stop solution  
762 was then added and the optical density at 450 nm was measured using a Tecan Infinite 200 PRO  
763 plate reader. For calculation of the relative inhibition of ACE2/RBD binding, the following formula  
764 was applied: Inhibition score (%) = (1 – OD value sample/OD value negative control) × 100%.  
765 Values below zero were set to zero.

766

### 767 **Data Presentation and Statistical Analysis**

768 If not stated otherwise, bars and symbols show the arithmetic mean of the indicated amount of  
769 independent replicates. Error bars indicate S.D. from at least three or S.E.M. from the indicated  
770 amount of individual experiments. Statistical analysis was performed with GraphPad Prism (V  
771 8.3.0 or 9.1.2) using two-tailed unpaired Student's t-tests or for comparing neutralizing activities  
772 the Friedman test and Dunn's multiple comparison unless indicated differently. *P* values <0.05

773 were considered significant (\*), <0.01 (\*\*), <0.001 (\*\*\*), <0.0001 (\*\*\*\*); n.s. = not significant  
774 ( $\geq 0.05$ ).

775

## 776 **ACKNOWLEDGEMENTS**

777 We thank Stefan Pöhlmann for providing the plasmids encoding SARS-CoV-2 spike-HA, ACE2,  
778 myc-TMPRSS2 and Medac GmbH, Wedel, Germany for providing HRP-VOC RBDs. We thank  
779 the NIH Reagent Program for providing critical reagents. We thank the Hannover Lung Transplant  
780 Program, Prof. D. Jonigk, Department of Pathology Hannover Medical School for providing human  
781 bronchial tissue. VMC is a participant of the Charité Clinician Scientist program funded by Charité  
782 – Universitätsmedizin Berlin and the Berlin Institute of Health. JK is supported by the Center of  
783 Infection Biology and Immunity (ZIBI). Part of this work was supported by the Bundesministerium  
784 für Bildung und Forschung (BMBF) through the projects RAPID-2 (01KI2006A) to CD, and Grant  
785 01KI2006F (RAPID-2) to TW, RECAST (01IK20337) to MAM, VMC; NaFoUniMedCovid19,  
786 Organo-Strat (01KX2021) to CG, CD, ACH, AB, MAM and TW; VARIPath (01KI2021) to VMC by  
787 the German Ministry of Health (Konsiliarlabor für Coronaviren and SeCoV) to CD and VMC, and  
788 by the Deutsche Forschungsgemeinschaft (DFG) (SFB TR84 to CD, MAM, TW, ACH; SPP 1923,  
789 GO2153/4 grant to CG; SFB 1449 Z02 to MAM; OS143/16-1 to KO); by funding from the Einstein  
790 Foundation (EC3R) to ACH; by funding from the Berlin Institute of Health (BIH) (to CG) and Freie  
791 Universität Berlin to JT and KO. SC and MW were supported by the Goethe-Corona-Fund of the  
792 Goethe University Frankfurt. MCJ, RO and UM were supported by COFONI 3FT21, BREATH  
793 (Biomedical Research In Endstage And Obstructive Lung Disease Hannover; DZL 82DZL002A1,  
794 82DZL002B1R2N German Centre for Lung Research (DZL), R2N, Federal State of Lower Saxony  
795 (74ZN1574).

796

## 797 **AUTHOR CONTRIBUTIONS**

798 Conceptualization: DN, CG, CD

799 Methodology: DN, KF, SSch, FWe, JT, CG, CD, AB, MAM  
800 Investigation: DN, KF, SSch, FWe, JT, AR, SSt, JJ, JE, JK, FP, LMJ, RO, MCJ, BT, JP, JH, FWa,  
801 MLS, NH, EMB, TV, MB, AB, JS, CM, MAM  
802 Resources: KH, MW, TTNT, SC, LGH, UM, MM, MAMü, CG, CD, AB, MAM, LH, VMC  
803 Writing – Original Draft: DN, CG, CD  
804 Writing – Review & Editing: DN, AB, MAM, KO, MaMü, VMC, CG, CD  
805 Visualization: DN, SSch, KF, JT, AR, SSt, JE, JK, FP, LMJ  
806 Supervision: DN, SC, MAM, ACH, VT, KO, TW, UM, MAMü, VMC, CG, CD  
807 Funding Acquisition: AB, MAM, ACH, TW, VMC, CG, CD

808

809 **DECLARATION OF INTERESTS**

810 Technische Universität Berlin, Freie Universität Berlin and Charité - Universitätsmedizin have filed  
811 a patent application for siRNAs inhibiting SARS-CoV-2 replication with DN as co-author. MAMü  
812 and VMC are named together with Charité - Universitätsmedizin Berlin and Euroimmun  
813 Medizinische Labordiagnostika AG on a patent application (EP3715847) filed recently regarding  
814 the diagnostic of SARS-CoV-2 by antibody testing. The other authors declare no competing  
815 interests.

816

817

818

819

820

821

822

823

824



825  
826  
827  
828  
829  
830  
831  
832  
833  
834  
835  
836  
837  
838  
839

840 **LEGENDS**

841  
842 **Figure 1. B.1 and B.1.1.7 SARS-CoV-2 display similar replication kinetics in immortalized**  
843 **cell lines**

844 (A) Plaque morphology on Vero E6 cells which were infected with 1:100 diluted (B.1 and  
845 B.1.1.7/v1) or undiluted (B.1.1.7/v2) supernatants of infected Vero E6 cells.

846 (B) Vero E6 cells were infected at the indicated MOI and onset of CPE was monitored by live cell  
847 imaging until 70 hours post-infection.

848 (C-E) Virus growth was quantified in Vero E6 (C) Caco-2 (D) and Calu-3 (E) cells infected at  
849 indicated MOIs. Supernatant collected at the respective time points was titrated by plaque assay.

850 Growth kinetic experiments in Vero E6 and Caco-2 cells were each performed in triplicates. One  
851 representative experiment out of two is shown for Calu-3 cells.

852 (F) Virus growth in Calu-3 cells infected at an MOI of 0.1 was quantified at early time points after  
853 infection.

854 (G) Virus growth kinetics in Calu-3 cells at 37°C (left) and 32°C (right).

855 (H) Competition assay. Calu-3 cells were infected with a mixture of B.1 and B.1.1.7/v1 at indicated  
856 ratios. After serial passaging, viral RNA from the supernatant was isolated, sequenced and the  
857 relative proportion of B.1- and B.1.1.7-corresponding sequences (discriminated by a mutation in  
858 nsp12) was plotted. Data show arithmetic means of one experiment performed in triplicates.

859 Dashed horizontal lines indicate the lower detection limit of the plaque assay. Inoc.: Inoculum,  
860 MOI: multiplicity of infection, PFU: plaque forming units, p0-p5: passage 0 - passage 5.

861  
862 **Figure 2. Comparison of fitness in primary human respiratory cells, organoids and dwarf**  
863 **hamsters**

864 (A) Virus growth kinetics were performed in infected human nasal airway epithelial cultures  
865 (hNAECs) (MOI 0.1). Samples were collected from the apical and basal side at indicated time  
866 points and titrated by plaque assay. n=3 biological replicates.

867 (B) Virus growth kinetics was conducted in infected bronchial AEC (MOI 0.5). Samples were  
868 collected from the apical side and titrated by plaque assay. Data are derived from one experiment  
869 conducted in triplicates.

870 (C) Intestinal organoids were infected (MOI 0.05) and viral load in supernatant (left) and organoid  
871 lysates (right) was quantified at indicated time points by E-gene specific quantitative RT-PCR.  
872 Data are derived from four independent experiments.

873 (D) Virus replication was monitored in infected lung organoids (MOI 1). Samples harvested at  
874 indicated time points were titrated by plaque assay. Data are derived from three independent  
875 experiments.

876 (E) Dwarf hamsters were intranasally infected (100,000 PFU) and infectious virus particles from  
877 lung homogenates were quantified using plaque assay (left). Donor hamsters were co-housed  
878 with naive animals and transmission efficiency was determined from lung homogenates at the  
879 indicated time points (right). n=1-3 animals per experimental condition.

880 Dotted horizontal lines indicate the lower detection limit of the plaque assays. GE: genome  
881 equivalents, n.d.: not detected

882

### 883 **Figure 3. B.1.1.7 spike displays decreased proteolytic processing**

884 (A) Spike processing in lysates of HEK293T cells expressing empty vector or SARS-CoV-2 spike-  
885 HA encoding individual or all B.1.1.7-corresponding mutations was quantified by immunoblotting  
886 (upper panel). Shown is one representative immunoblot (bottom panel) out of four.

887 (B) Protein in lysed lentiviral particles pseudotyped with SARS-CoV-2 spike-HA was quantified by  
888 immunoblotting (upper panel). Shown is one representative immunoblot (bottom panel) out of four.

889 (C) Vero E6 cells were infected with SARS-CoV-2 (MOI 5). Cells and virus-containing  
890 supernatants were harvested at 48 hours post-infection and processed for detection of spike and  
891 nucleocapsid by immunoblotting. Processing of spike in cell lysates (left panel) and spike  
892 incorporation in concentrated virion preparations (middle panel) was quantified. One  
893 representative blot out of two is shown (right panel).

894 Black and white arrowheads indicate the bands of the uncleaved spike-HA precursor and of the  
895 cleaved S2-HA subunit, respectively. Statistical significance was calculated by a two-tailed, paired  
896 Student's T-test. kDa: kilodalton, UI: uninfected

897

### 898 **Figure 4. Membrane fusion and entry based on lentiviral pseudotypes and SARS-CoV-2** 899 **particles.**

900 (A) For Tat-mediated cell-cell fusion assay, CHO cells were co-transfected with plasmids  
901 expressing indicated spike-HA and HIV-1 Tat. LTR-luciferase-expressing target TZM-bl cells were

902 transfected with plasmids encoding human ACE2 and TMPRSS2. Transfected cells were co-  
903 cultured for eight hours and luciferase expression resulting from intercellular Tat transfer was  
904 quantified luminometrically. All values were normalized to B.1 spike (indicated by a dotted line).  
905 Shown are results from three-six biological replicates, each performed in triplicates.

906 (B) Calu-3 cells were transduced with lentiviral pseudoparticles expressing luciferase and  
907 decorated with indicated spike-HA. Transduction efficiency was quantified luminometrically.  
908 Dotted line indicates background levels of luciferase non-transduced cultures. Shown are results  
909 from six biological replicates, each performed in triplicates, indicated by symbols.

910 (C) Indicated A549 cells were transduced with increasing quantities (0.5  $\mu$ l, 5  $\mu$ l and 50  $\mu$ l) of  
911 lentiviral, luciferase-expressing particles pseudotyped with B.1- or B.1.1.7-spike. Transduction  
912 efficiency was determined luminometrically. Dotted line indicates luciferase background level of  
913 luciferase detected in non-transduced cells. Symbols represent individual values of three  
914 biological replicates, each performed in triplicates.

915 (D, E) Calu-3 (D) and indicated A549 (E) cells were infected at 4°C with B.1 or B.1.1.7 isolates  
916 (MOI 1) to allow synchronized infection. Total cellular RNA was isolated at the indicated time  
917 points and nucleocapsid-encoding subgenomic RNA was quantified by RT-PCR.

918 Del: deletion, RLU: relative light units, sgRNA N: subgenomic nucleocapsid RNA, conc.:  
919 concentration

920  
921 **Figure 5. B.1.1.7 fails to escape from neutralizing antibodies and may dampen induction of**  
922 **innate immunity**

923 (A) Neutralizing titers against the indicated virus strains were determined in plaque reduction  
924 neutralization tests (PRNT). Red line indicates median titers per group.

925 (B) Inhibition of ACE2/RBD interaction was measured using surrogate virus neutralization assays.  
926 Sera were tested using RBD proteins of B.1, B.1.1.7 and B.1.351 as indicated.

927 Red lines indicate median values. The same set of samples was measured in (A) and (B),  
928 vaccinees n=19, Non-VOC convalescent donors n=50, B.1.1.7 patients n=13.  
929 (C) Concentration (pg/ml) of cytokines and chemokines in the basal medium of infected bronchial  
930 airway epithelial cells (MOI 0.5). Concentration of cytokines and chemokines was determined by  
931 MagPix Luminex technology.

932 (D) Calu-3 cells were infected at indicated MOIs or left uninfected (UI) and cell lysates were  
933 generated 16 hours post-infection. Total RNA was extracted and expression of the indicated genes  
934 was determined by quantitative real-time PCR. Shown is the mean fold change +/- S.D.. The  
935 experiment was performed in triplicates.

936  
937 **Figure 6. B.1.1.7 and B.1.617.2 display a spike-dependent, ACE2-independent post-entry**  
938 **replication advantage in NCI-H1299 cells.**

939 (A) Virus growth of B.1 and B.1.1.7/v1 was assessed on NCI-H1299 cells. Cells were infected  
940 (MOI 0.01) and supernatants of indicated time points were titrated on Vero E6 cells. Plaque  
941 morphology of NCI-H1299-derived B.1 and B.1.1.7/v1 on Vero E6 cells is shown.

942 (B) NCI-H1299 cells were transduced with increasing amounts of lentiviral particles pseudotyped  
943 with indicated spike proteins. Pseudotype entry was analyzed luminometrically in cell lysates. Data  
944 from two biological replicates, each performed in triplicates, is shown. White symbols represent  
945 arithmetic means of the biological replicates.

946 (C) H1299 cells were infected in triplicates at 4°C with B.1 or B.1.1.7 isolates (MOI 1) to allow  
947 synchronized entry. Relative quantities of cell-associated nucleocapsid-specific subgenomic RNA  
948 were determined by quantitative RT-PCR. Two independent experiments were performed, each  
949 conducted in 3-4 replicates. Symbols represent the arithmetic means of each experiment.

950 (D) ACE2 expression levels were analyzed by immunoblotting. Beta-actin was used as a loading  
951 control.

952 (E) Expression of *TMPRSS2* and *ACE2* was quantified by quantitative RT-PCR in indicated cells.

953 (F, G) Calu-3 (F) and NCI-H1299 (G) cells were pretreated with 20 µg/ml anti-ACE2 antibody for  
954 one hour prior to infection with B.1 and B.1.1.7 isolates (MOI of 0.01). At 48 hours post-infection,  
955 viral replication was quantified from the supernatant by the use of E-gene assay. Results from two  
956 independently performed experiments, each conducted in triplicates, are shown.  
957 (H-J) Vero E6 (H), Calu-3 (J) and NCI-H1299 (J) cells were infected (MOI 0.01) and supernatant  
958 was titrated on Vero E6 cells. The growth experiment in Vero E6 cells was performed once in  
959 duplicates. Growth experiments in Calu-3 and NCI-H1299 cells were performed once in triplicates.  
960 (K-M) Virus growth of B.1, B.1.1.7 and B.1.617.2 isolates (MOI 0.01) was quantified in Calu-3 (K),  
961 human bronchial airway epithelial cells (hBAECs) (L) and NCI-H1299 (M) cells.  
962 Dashed horizontal lines indicate the lower limit of detection of the plaque assay.

963

## 964 REFERENCES

965

- 966 Abdelnabi, R., Boudewijns, R., Foo, C.S., Seldeslachts, L., Sanchez-Felipe, L., Zhang, X.,  
967 Delang, L., Maes, P., Kaptein, S.J.F., Weynand, B., et al. (2021). Comparing infectivity and  
968 virulence of emerging SARS-CoV-2 variants in Syrian hamsters. *EBioMedicine* 68, 103403.
- 969 Agarwal, S., Nikolai, B., Yamaguchi, T., Lech, P., and Somia, N.V. (2006). Construction and use  
970 of retroviral vectors encoding the toxic gene barnase. *Mol. Ther.* 14, 555–563.
- 971 Bates, T.A., Leier, H.C., Lyski, Z.L., McBride, S.K., Coulter, F.J., Weinstein, J.B., Goodman,  
972 J.R., Lu, Z., Siegel, S.A.R., Sullivan, P., et al. (2021). Neutralization of SARS-CoV-2 variants by  
973 convalescent and BNT162b2 vaccinated serum. *Nat. Commun.* 12, 5135.
- 974 Brown, J.C., Goldhill, D.H., Zhou, J., Peacock, T.P., Frise, R., Goonawardane, N., Baillon, L.,  
975 Kugathasan, R., Pinto, A.L., McKay, P.F., et al. (2021). Increased transmission of SARS-CoV-2  
976 lineage B.1.1.7 (VOC 202012/01) is not accounted for by a replicative advantage in primary  
977 airway cells or antibody escape.
- 978 Corman, V.M., Landt, O., Kaiser, M., Molenkamp, R., Meijer, A., Chu, D.K., Bleicker, T., Brünink,  
979 S., Schneider, J., Schmidt, M.L., et al. (2020). Detection of 2019 novel coronavirus (2019-nCoV)  
980 by real-time RT-PCR. *Euro Surveill.* 25.
- 981 Davies, N.G., Jarvis, C.I., CMMID COVID-19 Working Group, Edmunds, W.J., Jewell, N.P.,  
982 Diaz-Ordaz, K., and Keogh, R.H. (2021). Increased mortality in community-tested cases of  
983 SARS-CoV-2 lineage B.1.1.7. *Nature* 593, 270–274.
- 984 Gamage, A.M., Tan, K.S., Chan, W.O.Y., Liu, J., Tan, C.W., Ong, Y.K., Thong, M., Andiappan,  
985 A.K., Anderson, D.E., Wang, D.Y., et al. (2020). Infection of human Nasal Epithelial Cells with

- 986 SARS-CoV-2 and a 382-nt deletion isolate lacking ORF8 reveals similar viral kinetics and host  
987 transcriptional profiles. *PLoS Pathog.* *16*, e1009130.
- 988 Gentsch, M., Boyles, S.E., Cheluvvaraju, C., Chaudhry, I.G., Quinney, N.L., Cho, C., Dang, H.,  
989 Liu, X., Schlegel, R., and Randell, S.H. (2017). Pharmacological Rescue of Conditionally  
990 Reprogrammed Cystic Fibrosis Bronchial Epithelial Cells. *Am. J. Respir. Cell Mol. Biol.* *56*, 568–  
991 574.
- 992 Hikmet, F., Méar, L., Edvinsson, Å., Micke, P., Uhlén, M., and Lindskog, C. (2020). The protein  
993 expression profile of ACE2 in human tissues. *Mol. Syst. Biol.* *16*, e9610.
- 994 Hillus, D., Schwarz, T., Tober-Lau, P., Vanshylla, K., Hastor, H., Thibeault, C., Jentsch, S.,  
995 Helbig, E.T., Lippert, L.J., Tscheak, P., et al. (2021). Safety, reactogenicity, and immunogenicity  
996 of homologous and heterologous prime-boost immunisation with ChAdOx1 nCoV-19 and  
997 BNT162b2: a prospective cohort study. *Lancet Respir Med.*
- 998 Hoffmann, M., Kleine-Weber, H., Schroeder, S., Krüger, N., Herrler, T., Erichsen, S.,  
999 Schiergens, T.S., Herrler, G., Wu, N.-H., Nitsche, A., et al. (2020). SARS-CoV-2 Cell Entry  
1000 Depends on ACE2 and TMPRSS2 and Is Blocked by a Clinically Proven Protease Inhibitor. *Cell*  
1001 *181*, 271–280.e8.
- 1002 Hoffmann, M., Hofmann-Winkler, H., Krüger, N., Kempf, A., Nehlmeier, I., Graichen, L., Arora,  
1003 P., Sidarovich, A., Moldenhauer, A.-S., Winkler, M.S., et al. (2021a). SARS-CoV-2 variant  
1004 B.1.617 is resistant to bamlanivimab and evades antibodies induced by infection and  
1005 vaccination. *Cell Rep.* *36*, 109415.
- 1006 Hoffmann, M., Arora, P., Groß, R., Seidel, A., Hörnich, B., Hahn, A., Krüger, N., Graichen, L.,  
1007 Hofmann-Winkler, H., Kempf, A., et al. (2021b). SARS-CoV-2 variants B.1.351 and B.1.1.248:  
1008 Escape from therapeutic antibodies and antibodies induced by infection and vaccination.
- 1009 Jones, T.C., Biele, G., Mühlemann, B., Veith, T., Schneider, J., Beheim-Schwarzbach, J.,  
1010 Bleicker, T., Tesch, J., Schmidt, M.L., Sander, L.E., et al. (2021). Estimating infectiousness  
1011 throughout SARS-CoV-2 infection course. *Science* *373*.
- 1012 Kemp, S.A., Collier, D.A., Datir, R.P., Ferreira, I.A.T.M., Gayed, S., Jahun, A., Hosmillo, M.,  
1013 Rees-Spear, C., Mlcochova, P., Lumb, I.U., et al. (2021). SARS-CoV-2 evolution during  
1014 treatment of chronic infection. *Nature* *592*, 277–282.
- 1015 Kissler, S., Fauver, J.R., Mack, C., Tai, C.G., Breban, M.I., Watkins, A.E., Samant, R.M.,  
1016 Anderson, D.J., Ho, D.D., Grubaugh, N.D., et al. (2021a). Densely sampled viral trajectories  
1017 suggest longer duration of acute infection with B.1.1.7 variant relative to non-B.1.1.7 SARS-CoV-  
1018 2.
- 1019 Kissler, S.M., Fauver, J.R., Mack, C., Tai, C.G., Breban, M.I., Watkins, A.E., Samant, R.M.,  
1020 Anderson, D.J., Metti, J., Khullar, G., et al. (2021b). Viral dynamics of SARS-CoV-2 variants in  
1021 vaccinated and unvaccinated individuals (medRxiv).
- 1022 Kreye, J., Reincke, S.M., Kornau, H.-C., Sánchez-Sendin, E., Corman, V.M., Liu, H., Yuan, M.,  
1023 Wu, N.C., Zhu, X., Lee, C.-C.D., et al. (2020). A Therapeutic Non-self-reactive SARS-CoV-2  
1024 Antibody Protects from Lung Pathology in a COVID-19 Hamster Model. *Cell* *183*, 1058–  
1025 1069.e19.
- 1026 Lamers, M.M., Breugem, T.I., Mykytyn, A.Z., Wang, Y., Groen, N., Knoop, K., Schipper, D., van

- 1027 der Vaart, J., Koopman, C.D., Zhang, J., et al. (2021). Human organoid systems reveal in vitro  
1028 correlates of fitness for SARS-CoV-2 B.1.1.7.
- 1029 Liu, Y., Liu, J., Johnson, B.A., Xia, H., Ku, Z., Schindewolf, C., Widen, S.G., An, Z., Weaver,  
1030 S.C., Menachery, V.D., et al. (2021). Delta spike P681R mutation enhances SARS-CoV-2 fitness  
1031 over Alpha variant. *bioRxiv*.
- 1032 Lubinski, B., Frazier, L.E., T Phan, M., V., Bugembe, D.L., Tang, T., Daniel, S., Cotten, M.,  
1033 Jaimes, J.A., and Whittaker, G.R. (2021a). Spike protein cleavage-activation mediated by the  
1034 SARS-CoV-2 P681R mutation: a case-study from its first appearance in variant of interest (VOI)  
1035 A.23.1 identified in Uganda. *bioRxiv*.
- 1036 Lubinski, B., Tang, T., Daniel, S., Jaimes, J.A., and Whittaker, G.R. (2021b). Functional  
1037 evaluation of proteolytic activation for the SARS-CoV-2 variant B.1.1.7: role of the P681H  
1038 mutation. *bioRxiv*.
- 1039 Meng, B., Kemp, S.A., Papa, G., Datir, R., Ferreira, I.A.T.M., Marelli, S., Harvey, W.T., Lytras,  
1040 S., Mohamed, A., Gallo, G., et al. (2021). Recurrent emergence of SARS-CoV-2 spike deletion  
1041 H69/V70 and its role in the Alpha variant B.1.1.7. *Cell Rep.* 35, 109292.
- 1042 Mlcochova, P., Kemp, S., Dhar, M.S., Papa, G., Meng, B., Ferreira, I.A.T.M., Datir, R., Collier,  
1043 D.A., Albecka, A., Singh, S., et al. (2021). SARS-CoV-2 B.1.617.2 Delta variant replication and  
1044 immune evasion. *Nature*.
- 1045 Mok, B.W.-Y., Liu, H., Deng, S., Liu, J., Zhang, A.J., Lau, S.-Y., Liu, S., Tam, R.C.-Y., Cremin,  
1046 C.J., Ng, T.T.-L., et al. (2021). Low dose inocula of SARS-CoV-2 Alpha variant transmits more  
1047 efficiently than earlier variants in hamsters. *Commun Biol* 4, 1102.
- 1048 Momsen Reincke, S., Yuan, M., Kornau, H.-C., Corman, V.M., van Hoof, S., Sánchez-Sendin,  
1049 E., Ramberger, M., Yu, W., Hua, Y., Tien, H., et al. (2021). SARS-CoV-2 Beta variant infection  
1050 elicits potent lineage-specific and cross-reactive antibodies.
- 1051 Motozono, C., Toyoda, M., Zahradnik, J., Saito, A., Nasser, H., Tan, T.S., Ngare, I., Kimura, I.,  
1052 Uriu, K., Kosugi, Y., et al. (2021). SARS-CoV-2 spike L452R variant evades cellular immunity  
1053 and increases infectivity. *Cell Host Microbe* 29, 1124–1136.e11.
- 1054 Nuñez, I.A., Lien, C.Z., Selvaraj, P., Stauff, C.B., Liu, S., Starost, M.F., and Wang, T.T. (2021).  
1055 SARS-CoV-2 B.1.1.7 Infection of Syrian Hamster Does Not Cause More Severe Disease, and  
1056 Naturally Acquired Immunity Confers Protection. *mSphere* e0050721.
- 1057 Ong, S.W.X., Chiew, C.J., Ang, L.W., Mak, T.-M., Cui, L., Toh, M.P.H.S., Lim, Y.D., Lee, P.H.,  
1058 Lee, T.H., Chia, P.Y., et al. (2021). Clinical and virological features of SARS-CoV-2 variants of  
1059 concern: a retrospective cohort study comparing B.1.1.7 (Alpha), B.1.315 (Beta), and B.1.617.2  
1060 (Delta). *Clin. Infect. Dis.*
- 1061 O’Toole, Á., Hill, V., Pybus, O.G., Watts, A., Bogoch, I.I., Khan, K., Messina, J.P., Tegally, H.,  
1062 Lessells, R.R., Giandhari, J., et al. (2021). Tracking the international spread of SARS-CoV-2  
1063 lineages B.1.1.7 and B.1.351/501Y-V2. *Wellcome Open Res.* 6, 121.
- 1064 Parker, M.D., Lindsey, B.B., Shah, D.R., Hsu, S., Keeley, A.J., Partridge, D.G., Leary, S., Cope,  
1065 A., Amy State, Johnson, K., et al. (2021). Altered Subgenomic RNA Expression in SARS-CoV-2  
1066 B.1.1.7 Infections.



- 1067 Phelps, R.M., Johnson, B.E., Ihde, D.C., Gazdar, A.F., Carbone, D.P., McClintock, P.R.,  
1068 Linnoila, R.I., Matthews, M.J., Bunn, P.A., Jr, Carney, D., et al. (1996). NCI-Navy Medical  
1069 Oncology Branch cell line data base. *J. Cell. Biochem. Suppl.* 24, 32–91.
- 1070 Planas, D., Veyer, D., Baidaliuk, A., Staropoli, I., Guivel-Benhassine, F., Rajah, M.M., Planchais,  
1071 C., Porrot, F., Robillard, N., Puech, J., et al. (2021). Reduced sensitivity of SARS-CoV-2 variant  
1072 Delta to antibody neutralization. *Nature* 596, 276–280.
- 1073 Puray-Chavez, M., LaPak, K.M., Schrank, T.P., Elliott, J.L., Bhatt, D.P., Agajanian, M.J., Jasuja,  
1074 R., Lawson, D.Q., Davis, K., Rothlauf, P.W., et al. (2021). Systematic analysis of SARS-CoV-2  
1075 infection of an ACE2-negative human airway cell. *Cell Rep.* 36, 109364.
- 1076 Rajah, M.M., Hubert, M., Bishop, E., Saunders, N., Robinot, R., Grzelak, L., Planas, D., Dufloo,  
1077 J., Gellenoncourt, S., Bongers, A., et al. (2021). SARS-CoV-2 Alpha, Beta and Delta variants  
1078 display enhanced Spike-mediated Syncytia Formation.
- 1079 Ramanathan, M., Ferguson, I.D., Miao, W., and Khavari, P.A. (2021). SARS-CoV-2 B.1.1.7 and  
1080 B.1.351 spike variants bind human ACE2 with increased affinity. *Lancet Infect. Dis.* 21, 1070.
- 1081 von Rhein, C., Scholz, T., Henss, L., Kronstein-Wiedemann, R., Schwarz, T., Rodionov, R.N.,  
1082 Corman, V.M., Tonn, T., and Schnierle, B.S. (2021). Comparison of potency assays to assess  
1083 SARS-CoV-2 neutralizing antibody capacity in COVID-19 convalescent plasma. *J. Virol.*  
1084 *Methods* 288, 114031.
- 1085 Rosenke, K., Feldmann, F., Okumura, A., Hansen, F., Tang-Huau, T., Meade-White, K., Kaza,  
1086 B., Smith, B.J., Hanley, P.W., Lovaglio, J., et al. (2021). UK B.1.1.7 variant exhibits increased  
1087 respiratory replication and shedding in nonhuman primates. *bioRxiv*.
- 1088 Sato, T., Stange, D.E., Ferrante, M., Vries, R.G.J., Van Es, J.H., Van den Brink, S., Van Houdt,  
1089 W.J., Pronk, A., Van Gorp, J., Siersema, P.D., et al. (2011). Long-term expansion of epithelial  
1090 organoids from human colon, adenoma, adenocarcinoma, and Barrett's epithelium.  
1091 *Gastroenterology* 141, 1762–1772.
- 1092 Schlickeiser, S., Schwarz, T., Steiner, S., Wittke, K., Al Beshar, N., Meyer, O., Kalus, U., Pruß,  
1093 A., Kurth, F., Zoller, T., et al. (2020). Disease Severity, Fever, Age, and Sex Correlate With  
1094 SARS-CoV-2 Neutralizing Antibody Responses. *Front. Immunol.* 11, 628971.
- 1095 Shen, X., Tang, H., McDanal, C., Wagh, K., Fischer, W., Theiler, J., Yoon, H., Li, D., Haynes,  
1096 B.F., Sanders, K.O., et al. (2021). SARS-CoV-2 variant B.1.1.7 is susceptible to neutralizing  
1097 antibodies elicited by ancestral Spike vaccines. *bioRxiv*.
- 1098 Supasa, P., Zhou, D., Dejnirattisai, W., Liu, C., Mentzer, A.J., Ginn, H.M., Zhao, Y., Duyvesteyn,  
1099 H.M.E., Nutalai, R., Tuekprakhon, A., et al. (2021). Reduced neutralization of SARS-CoV-2  
1100 B.1.1.7 variant by convalescent and vaccine sera. *Cell* 184, 2201–2211.e7.
- 1101 Thibeault, C., Mühlemann, B., Helbig, E.T., Mittermaier, M., Lingscheid, T., Tober-Lau, P.,  
1102 Meyer-Arndt, L.A., Meiners, L., Stubbemann, P., Haenel, S.S., et al. (2021). Clinical and  
1103 virological characteristics of hospitalised COVID-19 patients in a German tertiary care centre  
1104 during the first wave of the SARS-CoV-2 pandemic: a prospective observational study. *Infection*  
1105 49, 703–714.
- 1106 Thorne, L.G., Bouhaddou, M., Reuschl, A.-K., Zuliani-Alvarez, L., Polacco, B., Pelin, A., Batra,  
1107 J., Whelan, M.V.X., Ummadi, M., Rojic, A., et al. (2021). Evolution of enhanced innate immune

- 1108 evasion by the SARS-CoV-2 B.1.1.7 UK variant. *bioRxiv*.
- 1109 Touret, F., Luciani, L., Baronti, C., Cochin, M., Driouich, J.-S., Gilles, M., Thirion, L., Nougairède,  
1110 A., and de Lamballerie, X. (2021). Replicative Fitness of a SARS-CoV-2 20I/501Y.V1 Variant  
1111 from Lineage B.1.1.7 in Human Reconstituted Bronchial Epithelium. *MBio* 12, e0085021.
- 1112 Trimpert, J., Vladimirova, D., Dietert, K., Abdelgawad, A., Kunec, D., Dökel, S., Voss, A., Gruber,  
1113 A.D., Bertzbach, L.D., and Osterrieder, N. (2020). The Roborovski Dwarf Hamster Is A Highly  
1114 Susceptible Model for a Rapid and Fatal Course of SARS-CoV-2 Infection. *Cell Rep.* 33,  
1115 108488.
- 1116 Ulrich, L., Halwe, N.J., Taddeo, A., Ebert, N., Schön, J., Devisme, C., Trüeb, B.S., Hoffmann, B.,  
1117 Wider, M., Bekliz, M., et al. (2021). Enhanced fitness of SARS-CoV-2 variant of concern B.1.1.7,  
1118 but not B.1.351, in animal models.
- 1119 Volz, E., Mishra, S., Chand, M., Barrett, J.C., Johnson, R., Geidelberg, L., Hinsley, W.R.,  
1120 Laydon, D.J., Dabrera, G., O'Toole, Á., et al. (2021). Assessing transmissibility of SARS-CoV-2  
1121 lineage B.1.1.7 in England. *Nature* 593, 266–269.
- 1122 Wang, H., Yang, P., Liu, K., Guo, F., Zhang, Y., Zhang, G., and Jiang, C. (2008). SARS  
1123 coronavirus entry into host cells through a novel clathrin- and caveolae-independent endocytic  
1124 pathway. *Cell Res.* 18, 290–301.
- 1125 Wang, Y., Chen, R., Hu, F., Lan, Y., Yang, Z., Zhan, C., Shi, J., Deng, X., Jiang, M., Zhong, S.,  
1126 et al. (2021). Transmission, viral kinetics and clinical characteristics of the emergent SARS-CoV-  
1127 2 Delta VOC in Guangzhou, China. *EClinicalMedicine* 40, 101129.
- 1128 Widera, M., Wilhelm, A., Hoehl, S., Pallas, C., Kohmer, N., Wolf, T., Rabenau, H.F., Corman,  
1129 V.M., Drosten, C., Vehreschild, M.J.G.T., et al. (2021). Limited neutralization of authentic SARS-  
1130 CoV-2 variants carrying E484K in vitro. *J. Infect. Dis.*
- 1131 Wölfel, R., Corman, V.M., Guggemos, W., Seilmaier, M., Zange, S., Müller, M.A., Niemeyer, D.,  
1132 Jones, T.C., Vollmar, P., Rothe, C., et al. (2020). Virological assessment of hospitalized patients  
1133 with COVID-2019. *Nature* 581, 465–469.
- 1134 Yang, T.-J., Yu, P.-Y., Chang, Y.-C., Liang, K.-H., Tso, H.-C., Ho, M.-R., Chen, W.-Y., Lin, H.-T.,  
1135 Wu, H.-C., and Hsu, S.-T.D. (2021). Effect of SARS-CoV-2 B.1.1.7 mutations on spike protein  
1136 structure and function. *Nat. Struct. Mol. Biol.* 28, 731–739.
- 1137 Youk, J., Kim, T., Evans, K.V., Jeong, Y.-I., Hur, Y., Hong, S.P., Kim, J.H., Yi, K., Kim, S.Y., Na,  
1138 K.J., et al. (2020). Three-Dimensional Human Alveolar Stem Cell Culture Models Reveal  
1139 Infection Response to SARS-CoV-2. *Cell Stem Cell* 27, 905–919.e10.
- 1140 Young, B.E., Fong, S.-W., Chan, Y.-H., Mak, T.-M., Ang, L.W., Anderson, D.E., Lee, C.Y.-P.,  
1141 Amrun, S.N., Lee, B., Goh, Y.S., et al. (2020). Effects of a major deletion in the SARS-CoV-2  
1142 genome on the severity of infection and the inflammatory response: an observational cohort  
1143 study. *Lancet* 396, 603–611.
- 1144 Yu, J., Li, Z., He, X., Gebre, M.S., Bondzie, E.A., Wan, H., Jacob-Dolan, C., Martinez, D.R.,  
1145 Nkolola, J.P., Baric, R.S., et al. (2021). Deletion of the SARS-CoV-2 Spike Cytoplasmic Tail  
1146 Increases Infectivity in Pseudovirus Neutralization Assays. *J. Virol.*
- 1147 Zufferey, R., Nagy, D., Mandel, R.J., Naldini, L., and Trono, D. (1997). Multiply attenuated

1148    lentiviral vector achieves efficient gene delivery in vivo. *Nat. Biotechnol.* *15*, 871–875.

1149

bioRxiv preprint doi: <https://doi.org/10.1101/2021.10.20.465121>; this version posted October 20, 2021. The copyright holder for this preprint (which was not certified by peer review) is the author/funder, who has granted bioRxiv a license to display the preprint in perpetuity. It is made available under aCC-BY-ND 4.0 International license.

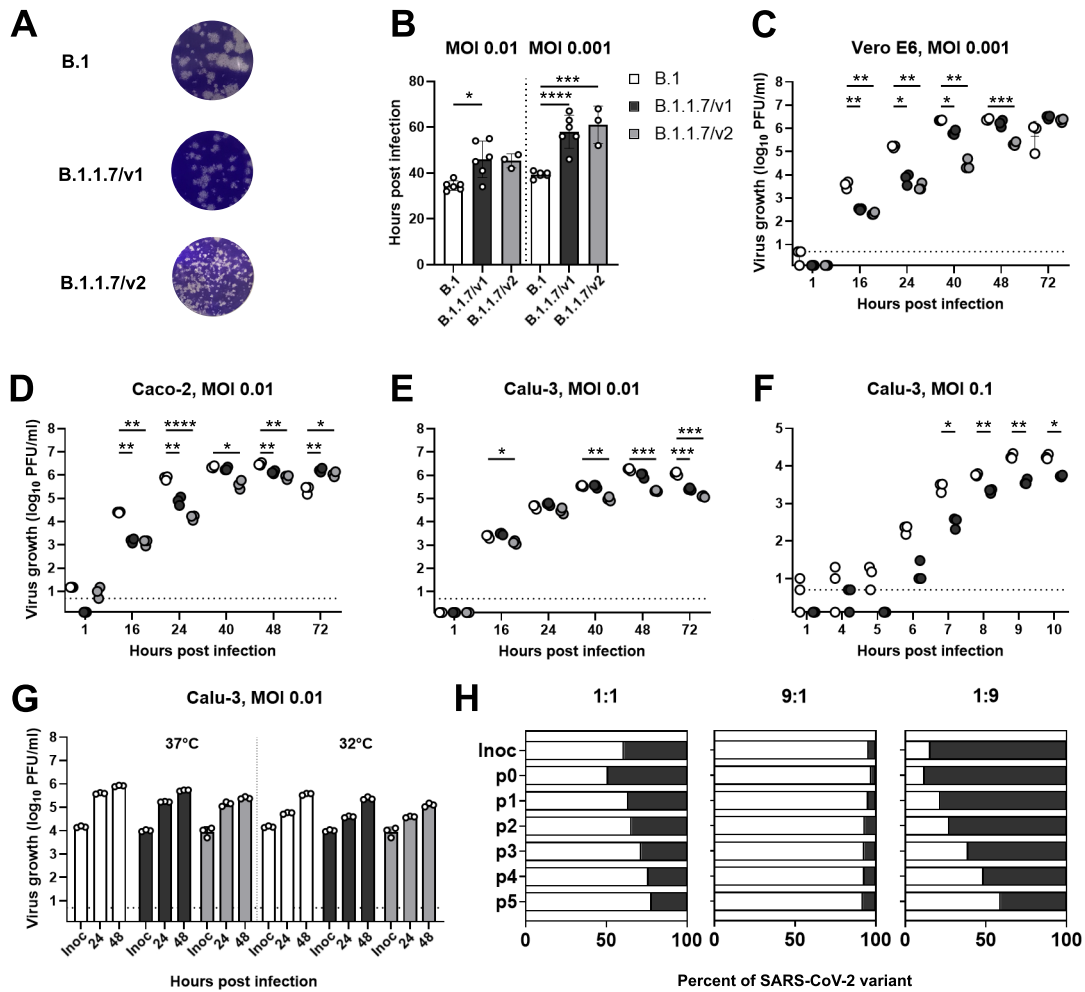

bioRxiv preprint doi: <https://doi.org/10.1101/2021.10.20.465121>; this version posted October 20, 2021. The copyright holder for this preprint (which was not certified by peer review) is the author/funder, who has granted bioRxiv a license to display the preprint in perpetuity. It is made available under aCC-BY-ND 4.0 International license.

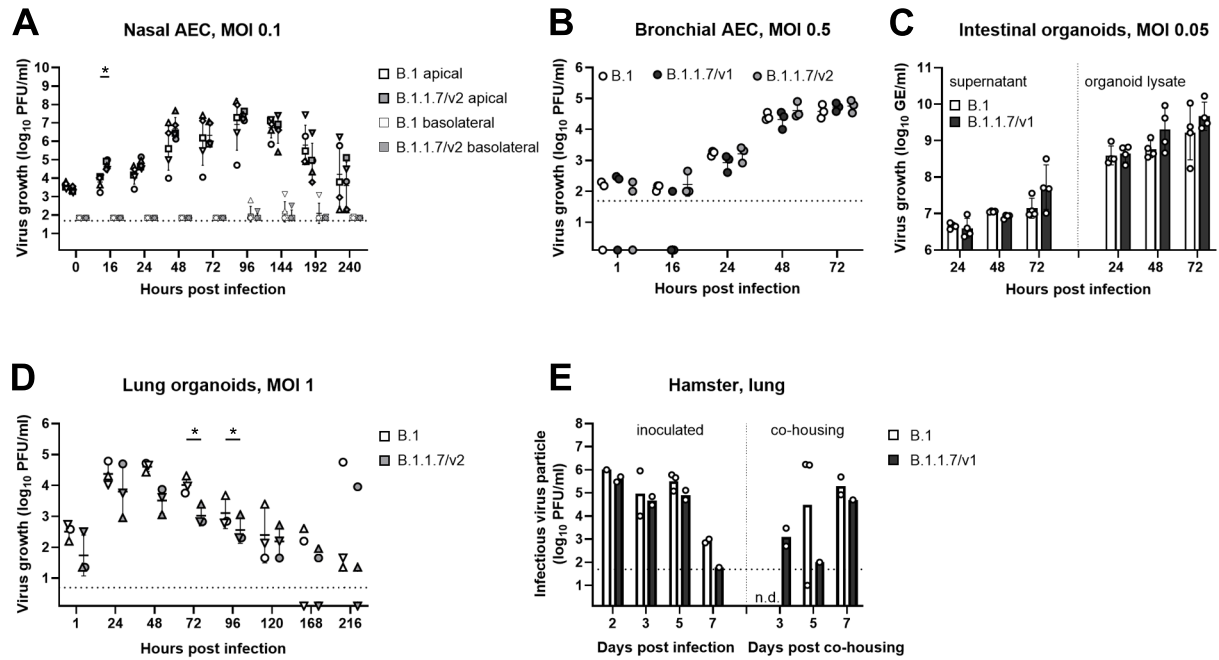

bioRxiv preprint doi: <https://doi.org/10.1101/2021.10.20.465121>; this version posted October 20, 2021. The copyright holder for this preprint (which was not certified by peer review) is the author/funder, who has granted bioRxiv a license to display the preprint in perpetuity. It is made available under aCC-BY-ND 4.0 International license.

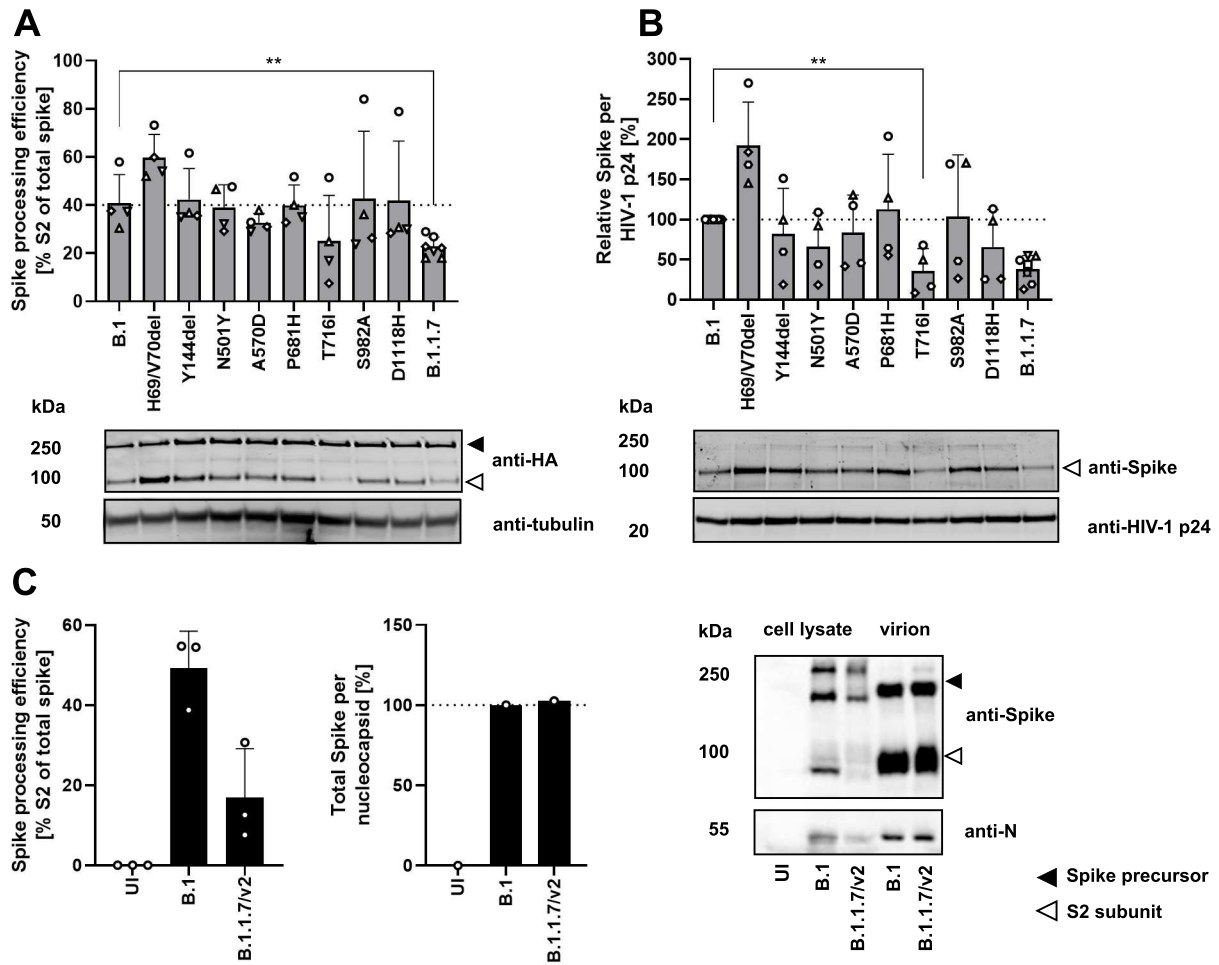

bioRxiv preprint doi: <https://doi.org/10.1101/2021.10.20.465121>; this version posted October 20, 2021. The copyright holder for this preprint (which was not certified by peer review) is the author/funder, who has granted bioRxiv a license to display the preprint in perpetuity. It is made available under aCC-BY-ND 4.0 International license.

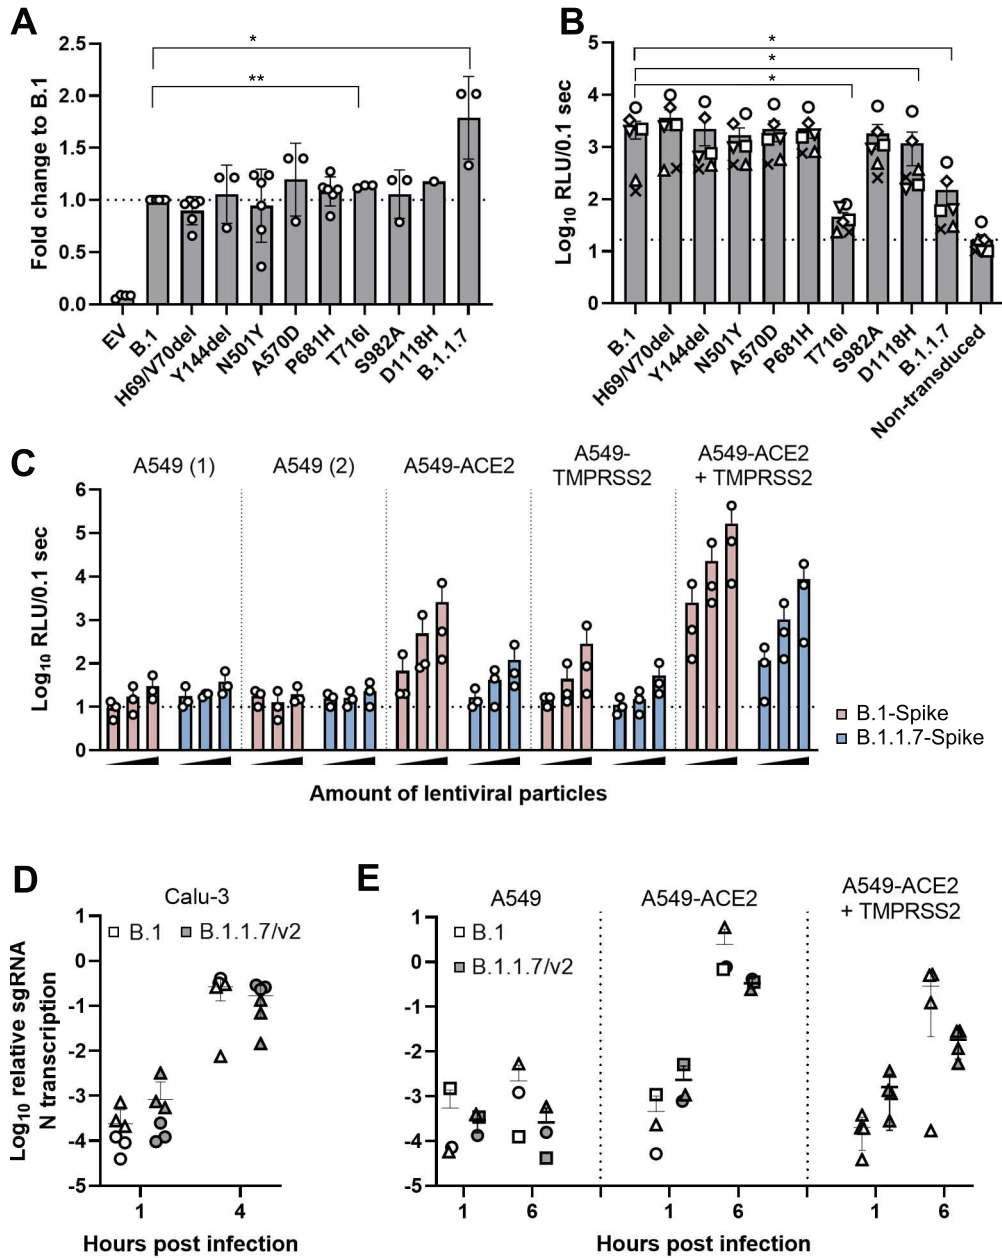

bioRxiv preprint doi: <https://doi.org/10.1101/2021.10.20.465121>; this version posted October 20, 2021. The copyright holder for this preprint (which was not certified by peer review) is the author/funder, who has granted bioRxiv a license to display the preprint in perpetuity. It is made available under aCC-BY-ND 4.0 International license.

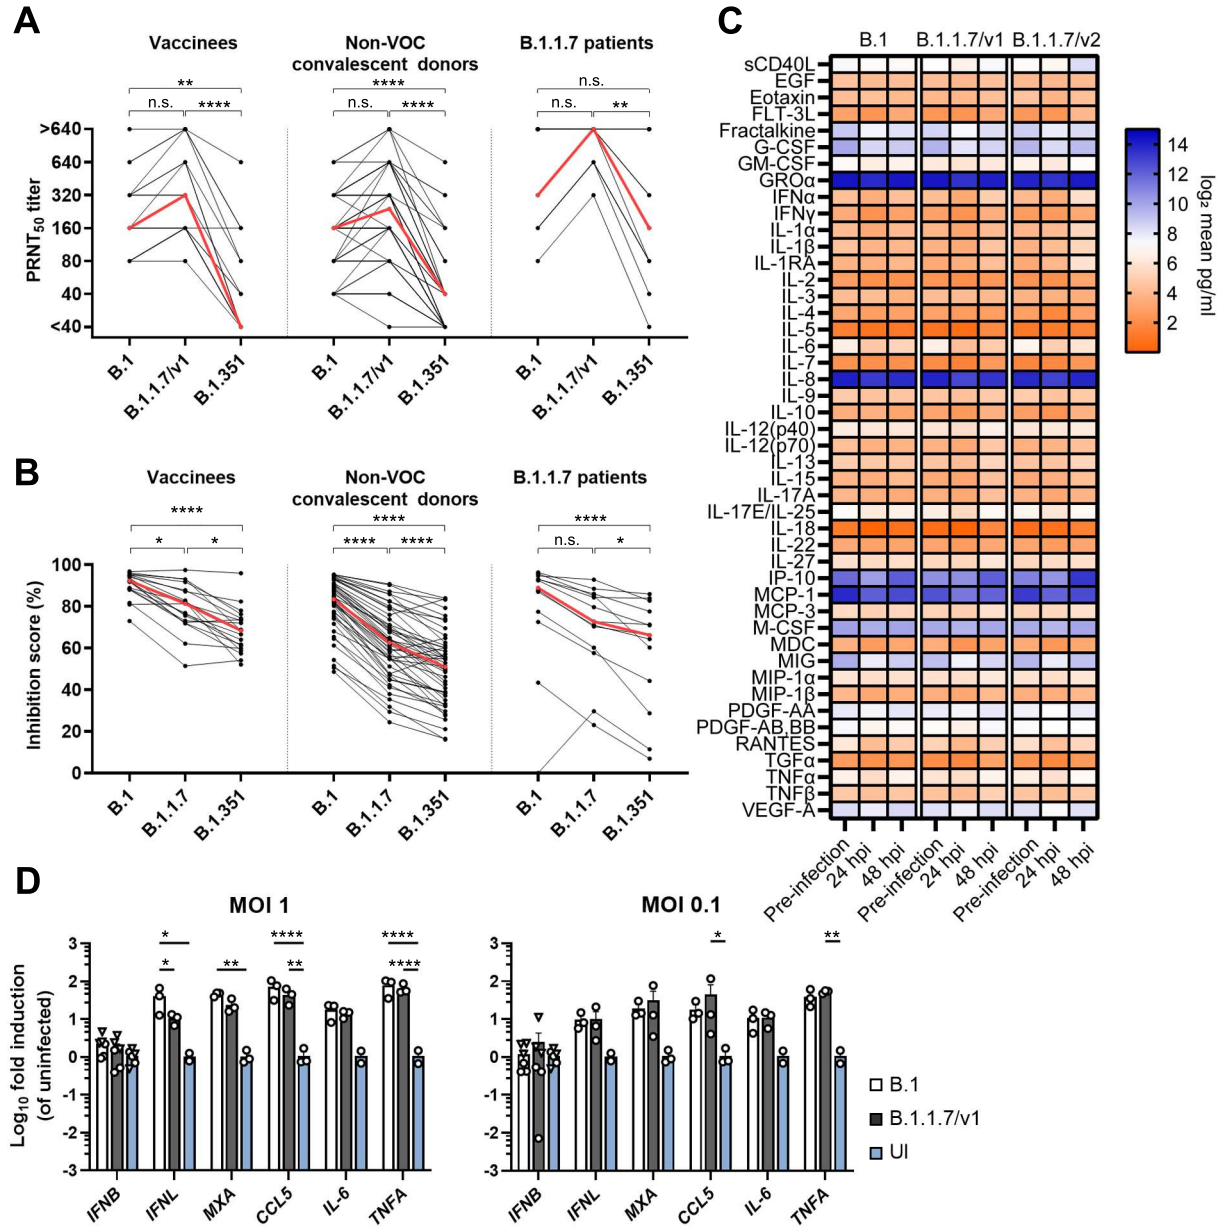



bioRxiv preprint doi: <https://doi.org/10.1101/2021.10.20.465121>; this version posted October 20, 2021. The copyright holder for this preprint (which was not certified by peer review) is the author/funder, who has granted bioRxiv a license to display the preprint in perpetuity. It is made available under aCC-BY-ND 4.0 International license.

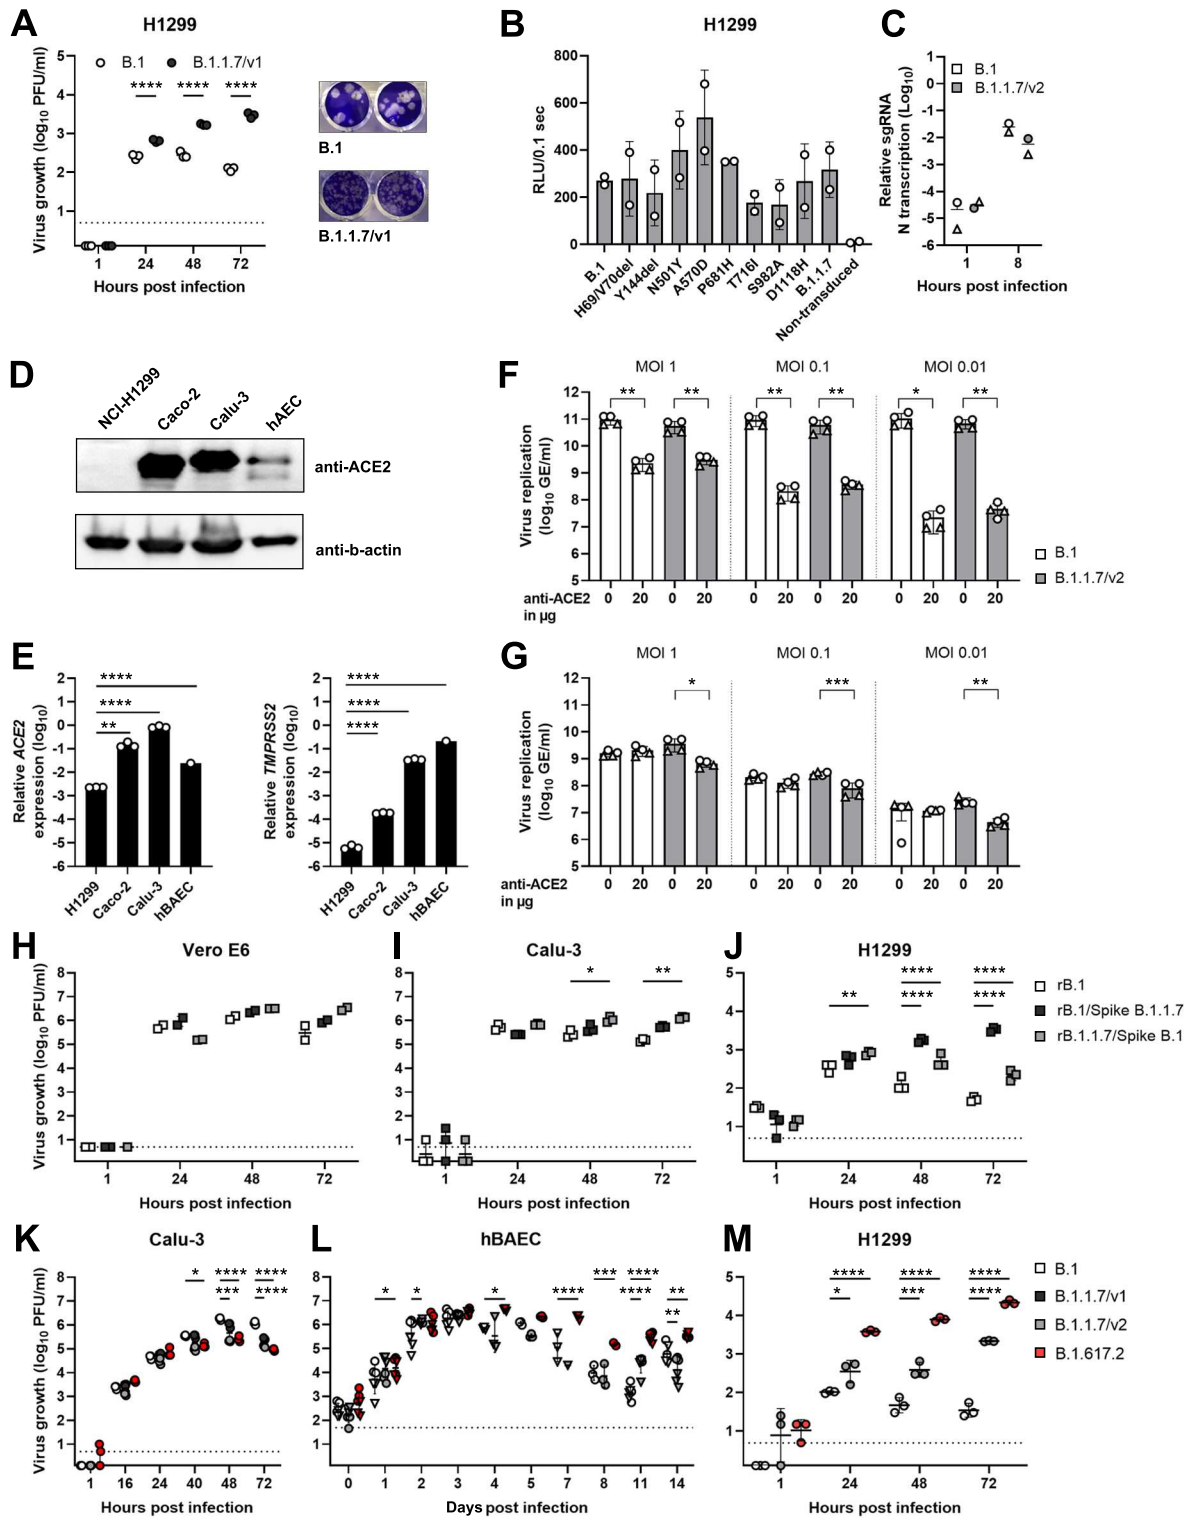

**Post-entry, spike-dependent replication advantage of B.1.1.7 and B.1.617.2 over B.1**

**SARS-CoV-2 in an ACE2-deficient human lung cell line**

Daniela Niemeyer<sup>1,2</sup>, Simon Schroeder<sup>1</sup>, Kirstin Friedmann<sup>1</sup>, Friderike Weege<sup>1</sup>, Jakob Trimpert<sup>3</sup>, Anja Richter<sup>1</sup>, Saskia Stenzel<sup>1,4</sup>, Jenny Jansen<sup>1,4</sup>, Jackson Emanuel<sup>1</sup>, Julia Kazmierski<sup>1,4</sup>, Fabian Pott<sup>1,4</sup>, Lara M. Jeworowski<sup>1</sup>, Ruth Olmer<sup>5</sup>, Mark-Christian Jaboreck<sup>5</sup>, Beate Tenner<sup>1</sup>, Jan Papies<sup>1</sup>, Julian Heinze<sup>1,2</sup>, Felix Walper<sup>1</sup>, Marie L. Schmidt<sup>1</sup>, Nicolas Heinemann<sup>1</sup>, Elisabeth Möncke-Buchner<sup>1</sup>, Talitha Veith<sup>1,2</sup>, Morris Baumgardt<sup>6</sup>, Karen Hoffmann<sup>6</sup>, Marek Widera<sup>7</sup>, Tran Thi Nhu Thao<sup>8</sup>, Anita Balázs<sup>9</sup>, Jessica Schulze<sup>10</sup>, Christin Mache<sup>10</sup>, Markus Morkele<sup>11,12</sup>, Sandra Ciesek<sup>7, 17, 18</sup>, Leif G. Hanitsch<sup>13</sup>, Marcus A. Mall<sup>4,9,15</sup>, Andreas C. Hocke<sup>6</sup>, Volker Thiel<sup>8</sup>, Klaus Osterrieder<sup>3,16</sup>, Thorsten Wolff<sup>10</sup>, Ulrich Martin<sup>5</sup>, Victor M. Corman<sup>1,2,14</sup>, Marcel A. Müller<sup>1,2</sup>, Christine Goffinet<sup>1,4,\*</sup>, Christian Drosten<sup>1,2,4,14\*</sup>

**SUPPLEMENTAL INFORMATION**

**Supplemental Figures (Figures S1-S3)**

**Supplemental Tables (Tables S1-S2)**

**Supplemental Movies**

bioRxiv preprint doi: <https://doi.org/10.1101/2021.10.20.465121>; this version posted October 20, 2021. The copyright holder for this preprint (which was not certified by peer review) is the author/funder, who has granted bioRxiv a license to display the preprint in perpetuity. It is made available under aCC-BY-ND 4.0 International license.

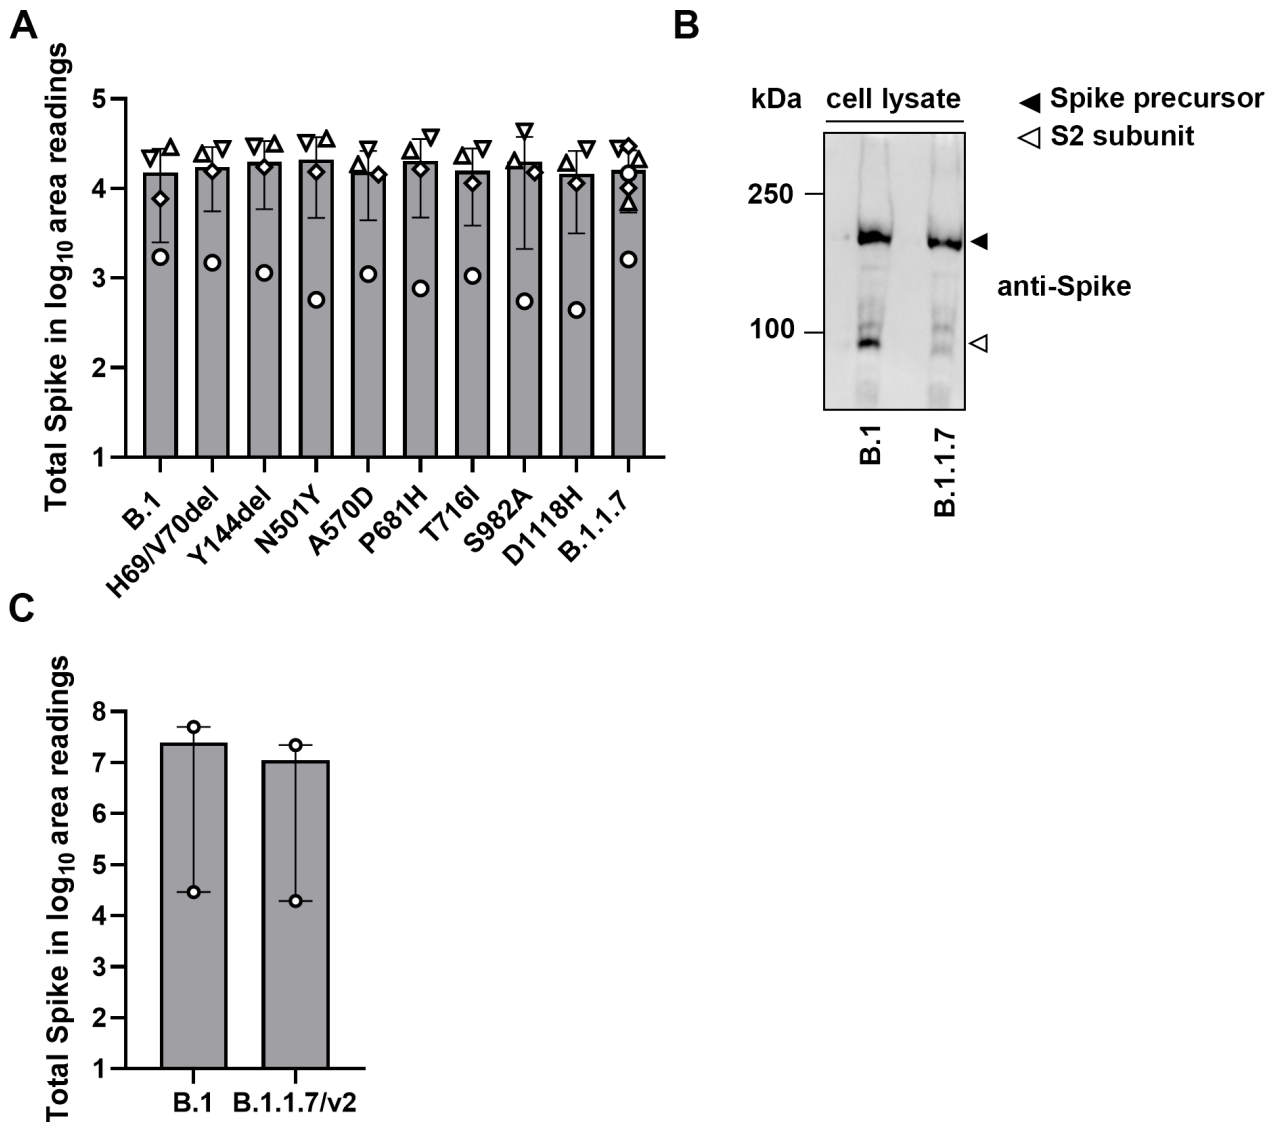

**Figure S1. B.1 and B.1.1.7 spike is expressed at similar levels.**

(A) Expression of total spike in HEK-293T cells. Symbols represent independently performed experiments.

(B) Vero E6 cells were infected with SARS-CoV-2 (MOI 5). Cells and virus-containing supernatants were harvested at 48 hours post-infection and processed for detection of spike by immunoblotting.

(C) Expression of total Spike in Vero E6 cells was quantified by the use of ImageJ 1.48v.

bioRxiv preprint doi: <https://doi.org/10.1101/2021.10.20.465121>; this version posted October 20, 2021. The copyright holder for this preprint (which was not certified by peer review) is the author/funder, who has granted bioRxiv a license to display the preprint in perpetuity. It is made available under aCC-BY-ND 4.0 International license.

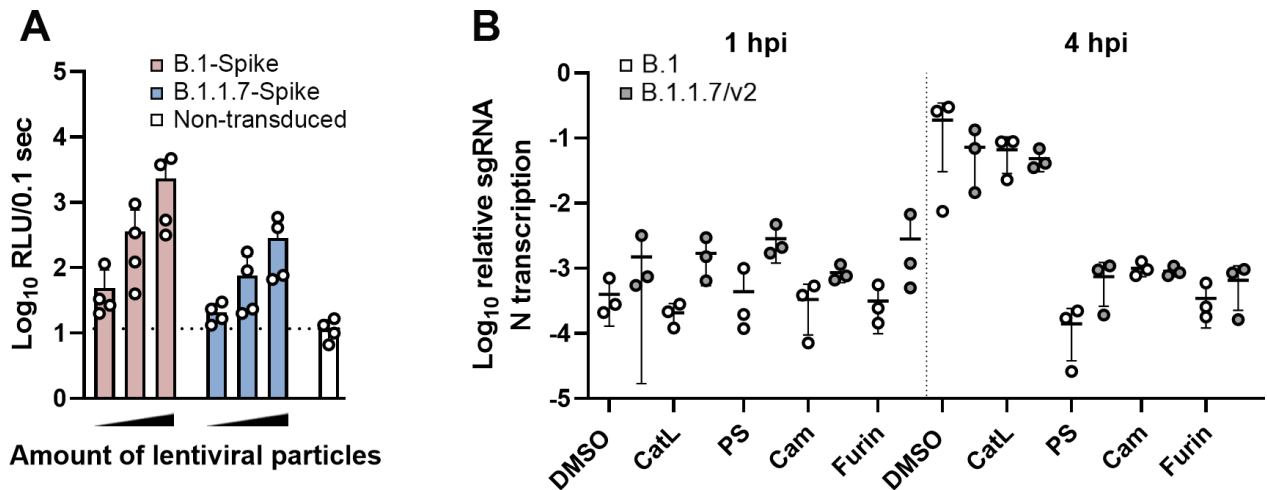

**Figure S2. B.1.1.7 spike is not superior in mediating entry compared to B.1 spike**

(A) Calu-3 cells were transduced for 72 hours with increasing amounts of lentiviral particles (0.1  $\mu$ l, 1  $\mu$ l and 10  $\mu$ l) pseudotyped with either WT- or B.1.1.7-spike proteins. Pseudotype entry was analyzed luminometrically in cell lysates.

(B) Calu-3 cells were pretreated with 25  $\mu$ M MDL28170 (Cathepsin L inhibitor), 25  $\mu$ M pitstop II (clathrin inhibitor), 100  $\mu$ M Camostat (TMPRSS2 inhibitor) or 15  $\mu$ M CMK (furin inhibitor), infected and entry efficiency was determined by sgN quantitative RT-PCR.

DMSO: Dimethylsulfoxid, CatL: Cathepsin L, PS: PitStop, Cam: Camostat mesylate

bioRxiv preprint doi: <https://doi.org/10.1101/2021.10.20.465121>; this version posted October 20, 2021. The copyright holder for this preprint (which was not certified by peer review) is the author/funder, who has granted bioRxiv a license to display the preprint in perpetuity. It is made available under aCC-BY-ND 4.0 International license.

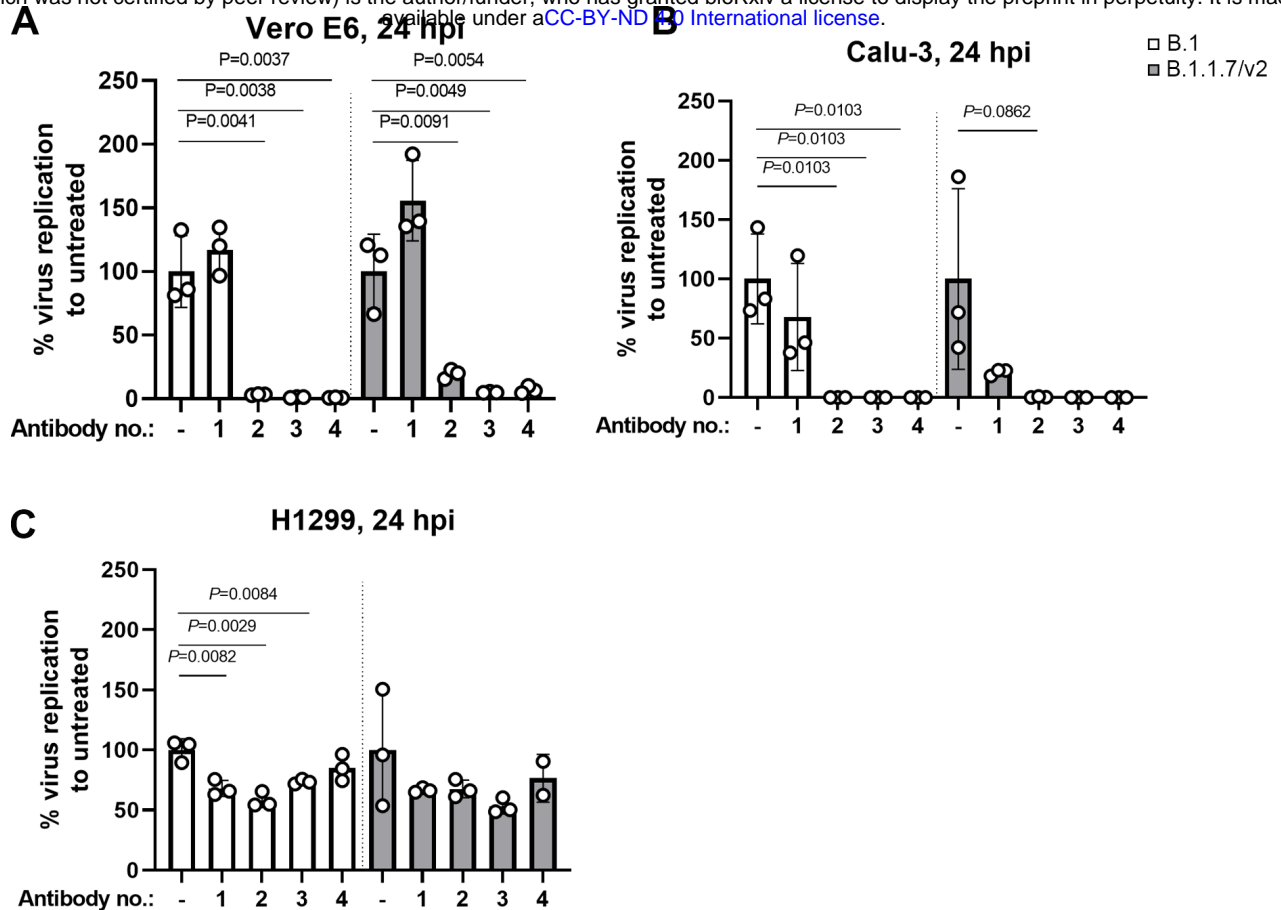

**Figure S3. ACE2-dependent growth of SARS-CoV-2 in Vero E6 and Calu-3 cells, but not in NCI-H1299 cells**

(A-C) Vero E6 (A), Calu-3 (B) and NCI-H1299 (C) cells were pretreated with four different anti-ACE2 antibodies (each applied at final concentration of 20  $\mu$ g/ml) for one hour prior to infection with B.1- and B.1.1.7 isolates (MOI of 0.01). At 24 hours post-infection, viral replication was quantified from the supernatant by the use of E-gene assay. Replication was normalized to the respective untreated cells. Results from one experiment, conducted in triplicates, are shown.

**Supplemental Tables****Table S1. Primers used for reconstruction of recombinant SARS-CoV-2**

|                                                        |                              |
|--------------------------------------------------------|------------------------------|
| Side directed mutagenesis:                             |                              |
| F10 D614G F                                            | TCTTTATCAGGGTGTAACTGCAC      |
| F10 D614G R                                            | ACAGCAACCTGGTTAGAAGTATTTG    |
| RT PCR:                                                |                              |
| 5R                                                     | TGTTTAGCAAGATTGTGTCCGCT      |
| 10R                                                    | AACAGTATTCTTTGCTATAGTAGTCGG  |
| 15R                                                    | AAAGGTGTGAACATAACCATCCACTG   |
| 19R                                                    | TCTAAGCATAGTGAAAAGCATTGTCTG  |
| 23R                                                    | CTGATAGCAGCATTACCATCCTG      |
| 28R                                                    | GAGCCCTGTGATGAATCAACAGT      |
| 33R                                                    | CCTTAGAAACTACAGATAAATCTTGGGA |
| 38R                                                    | ACTAGCGCATATACCTGCACC        |
| 42R                                                    | TGAGTACAGCTGGTAATAGTCTGAAG   |
| 47R                                                    | CGGCCAATGTTTGTAAATCAGTTCC    |
| Nested PCR and TAR fragment generation:                |                              |
| Primers used as published with exception for F3 and F9 |                              |
| B.1.1.7 F3 F                                           | TGGCTTCACATATGTATTGTTCTTTT   |
| B.1.1.7 F9 R                                           | GCATCAGTAGTGTCATCAATGTC      |

bioRxiv preprint doi: <https://doi.org/10.1101/2021.10.20.465121>; this version posted October 20, 2021. The copyright holder for this preprint (which was not certified by peer review) is the author/funder, who has granted bioRxiv a license to display the preprint in perpetuity. It is made available under aCC-BY-NC-ND 4.0 International license.

**Table S2. Primers used for quantitative RT-PCR**

| Name         | Sequence 5' to 3'                       |
|--------------|-----------------------------------------|
| huIFNB1-F    | AGGATTCTGCATTACCTGAAGG                  |
| huIFNB1-R    | GGCTAGGAGATCTTCAGTTTCG                  |
| huIFNB1-P    | TCCACTCTGACTATGGTCCAGGCA                |
| huIFNL1-F    | GACGCCTTGGAAGAGTCACTC                   |
| huIFNL1-R    | CCTACCTGGAGAAGCCTTAG                    |
| IL29_P       | AGTTGCAGCTCTCCTGTCTTCCCCG               |
| hMXA_F       | TTCAGACCTGATGGCCTATC                    |
| hMXA_R       | TGGATGATCAAAGGGATGTGG                   |
| hMXA_P       | CAGGAGGCCAGCAAGCGCCATC                  |
| hIL6_F       | GGATTCAATGAGGAGACTTGC                   |
| hIL6_R       | CACAGCTCTGGCTTGTTCC                     |
| hIL6_P       | AATCATCACTGGTCTTTTGGAGTTTGAGG           |
| hTNF-alpha_F | TGGCCCAGGCAGTCAGA                       |
| hTNF-alpha_R | TGTAGCCCATGTTGTAGCAAACC                 |
| hTNF-alpha_P | CATCTTCTCGAACCCCGAGTGACAAGC             |
| hTBP_F       | GCTGCGGTAATCATGAGGATAAG                 |
| hTBP_P       | AGCCACGAACCACGGCACTGATTTT               |
| hTBP_R       | TGCACACCATTTTCCCAGAA                    |
| hACE2_F      | TGCCTATCCTTCCTATATCAGTCCAA              |
| hACE2_R      | GAGTACAGATTTGTCCAAAATCTAC               |
| hACE2_P      | ATGCCTCCCTGCTCATTGCTTGGT                |
| hTMPRSS2     | Hs01122322_m1 (ThermoFisher Scientific) |

bioRxiv preprint doi: <https://doi.org/10.1101/2021.10.20.465121>; this version posted October 20, 2021. The copyright holder for this preprint (which was not certified by peer review) is the author/funder, who has granted bioRxiv a license to display the preprint in perpetuity. It is made available under aCC-BY-ND 4.0 International license.

**Supplemental Movies 1 and 2. Delayed cytopathic onset of B.1.1.7 SARS-CoV-2 infection**

Vero E6 cells were infected with B.1, B.1.1.7/v1 and B.1.1.7/v2 (MOI 0.01, supplemental movie 1; MOI 0.001, supplemental movie 2). Onset of CPE was monitored by live cell imaging until 70 hours post infection.
